1 Co-surveillance of ribosomal RNA by the exosome complex and nucleolar RNAi in  
2 *C. elegans*

3  
4 Shimiao Liao<sup>1‡</sup>, Xiangyang Chen<sup>1‡</sup>, Ting Xu<sup>1‡</sup>, Qile Jin<sup>1</sup>, Zongxiu Xu<sup>1</sup>, Demin Xu<sup>1</sup>,  
5 Xufei Zhou<sup>1</sup>, Chengming Zhu<sup>1\*</sup>, Shouhong Guang<sup>1,2\*</sup> and Xuezhu Feng<sup>1\*</sup>

6  
7 <sup>1</sup>Ministry of Education Key Laboratory for Membraneless Organelles & Cellular  
8 Dynamics, Hefei National Laboratory for Physical Sciences at the Microscale, School  
9 of Life Sciences, Division of Life Sciences and Medicine, University of Science and  
10 Technology of China, Hefei, Anhui 230027, P.R. China

11 <sup>2</sup>CAS Center for Excellence in Molecular Cell Science, Chinese Academy of Sciences,  
12 Hefei, Anhui 230027, P.R. China

13 ‡These authors contributed equally to this work.

14 \*Correspondence should be addressed to [zcm916@ustc.edu.cn](mailto:zcm916@ustc.edu.cn), [sguang@ustc.edu.cn](mailto:sguang@ustc.edu.cn)  
15 and [fengxz@ustc.edu.cn](mailto:fengxz@ustc.edu.cn).

16

17

18 Running title: rRNAs Quality control by nucleolar RNAi and RNA exosome

19

20 Keywords: nucleolus, rRNA, rsiRNA, exosome, nucleolar RNAi, transcription

21

22

23

## 24 **Abstract**

25 Eukaryotic cells express a wide variety of endogenous small regulatory RNAs that  
26 function in the nucleus. We previously found that erroneous rRNAs induce the  
27 generation of antisense ribosomal siRNAs (risiRNAs) which silence the expression of  
28 rRNAs via the nuclear RNAi defective (Nrde) pathway. To further understand the  
29 biological roles and mechanisms of this class of small regulatory RNAs, we conducted  
30 forward genetic screening to identify factors involved in risiRNA generation in  
31 *Caenorhabditis elegans*. We found that risiRNAs accumulated in the RNA exosome  
32 mutants. risiRNAs directed a NRDE-dependent silencing of pre-rRNAs in the  
33 nucleolus. In the presence of risiRNA, NRDE-2 accumulated in the nucleolus and  
34 colocalized with RNA polymerase I. risiRNA inhibited the transcription elongation of  
35 RNA polymerase I by decreasing RNAP I occupancy downstream of the site of RNAi.  
36 Meanwhile, exosome mislocalized from the nucleolus to nucleoplasm in suppressor of  
37 siRNA (*susi*) mutants, in which erroneous rRNAs accumulated. These results establish  
38 a novel model of rRNA surveillance by combining ribonuclease-mediated RNA  
39 degradation with small RNA-directed nucleolar RNAi system.

40

## 41 **Introduction**

42 In eukaryotic cells, ribosomal RNAs (rRNAs) are transcribed by RNA polymerase  
43 I into a single 47S polycistronic precursor in the nucleolus, which are then processed  
44 and matured into 18S, 5.8S, and 28S rRNAs; 5S rRNA is independently transcribed by  
45 RNA polymerase III in the nucleus. The processing of ribosomal RNAs is  
46 extraordinarily complicated, in which defects of any steps could induce the  
47 accumulation of erroneous rRNAs [1, 2]. Immature rRNA intermediates or erroneous  
48 rRNAs are degraded by multiple surveillance machineries. In the nucleus, the RNA  
49 exosome has a central role in monitoring nearly every type of transcripts produced by  
50 RNA polymerase I, II, and III (RNAP I, II, and III) [3]. The eukaryotic nuclear RNA  
51 exosome is a 3' to 5' exoribonuclease complex, consisting of a 9-protein catalytically  
52 inactive core complex (EXO-9) and two catalytic subunits, Rrp6 (also known as  
53 EXOSC10), and Dis3 (also known as Rrp44 or EXOSC11)[4]. Erroneous rRNAs are

54 degraded from 3' to 5' by the RNA exosome complex. In the cytoplasm, erroneous  
55 rRNAs can be polyuridylated and degraded from 3' to 5' by the cytoplasmic  
56 exoribonuclease DIS3L2 (also known as SUSI-1 in *C. elegans*) [5, 6].

57

58 rRNA-derived small RNAs have been identified in a number of organisms. In  
59 *Schizosaccharomyces pombe*, defects in TRAMP-mediated RNA surveillance system  
60 elicit the biogenesis of rRNA-siRNAs (rr-siRNAs) and reduce the levels of centromeric  
61 siRNAs [7]. In *Arabidopsis*, 24- or 21-nt rDNA-derived siRNAs have been identified  
62 and the latter siRNAs are accumulated upon viral infection or the depletion of the 5' to  
63 3' RNA degradation machineries [8-12]. In *Neurospora crassa*, 20- to 21-nt qiRNAs  
64 are produced from aberrant rRNAs in an RNA-dependent RNA polymerase (RdRP)-  
65 dependent manner, and function in DNA damage repair [13]. In *C. elegans*, 22G  
66 antisense ribosomal siRNAs (risiRNAs) are generated upon environmental stresses or  
67 improper pre-rRNA processing [5, 14, 15]. risiRNAs down-regulate pre-rRNAs  
68 through the nuclear RNAi pathway in the nucleolus [16].

69

70 Small regulatory RNAs direct sequence-specific regulation of gene expression via  
71 the mechanism termed RNA interference (RNAi). Small RNAs guide the Argonaute-  
72 containing protein complex to complementary nucleic acids and modulate gene  
73 expression by a number of mechanisms, including but not limiting to RNA degradation,  
74 translation inhibition, inducing heterochromatin formation, and inhibiting transcription  
75 elongation [17, 18]. In *C. elegans*, siRNAs silence nuclear-localized RNAs co-  
76 transcriptionally via the Nrde pathway. The NRDE complex transports 22G siRNAs  
77 from the cytoplasm to the nucleus, inhibits RNA polymerase II during the elongation  
78 phase of transcription and induces histone H3 lysine 9 (H3K9) and histone H3 lysine  
79 27 (H3K27) trimethylation [19-21]. Similarly, the nuclear Argonaute protein NRDE-3  
80 bind risiRNAs and translocate from the cytoplasm to the nucleolus, in which the  
81 risiRNA/NRDE complex associates with pre-rRNAs and reduces the level of pre-  
82 rRNAs [5, 14]. However, the detailed mechanism of risiRNA-mediated pre-rRNA  
83 silencing is poorly understood.

84

85 To further understand the biological roles and mechanisms of risiRNA, in this study,  
86 we isolated a series of exosome mutants in which risiRNAs were accumulated by  
87 forward and reverse genetic screens and CRISPR-Cas9-mediated gene knockout  
88 technology. We found that the nucleolar localization of RNA exosome was important  
89 for risiRNA suppression. Meanwhile, we developed a RNAP I transcription activity  
90 assay and demonstrated that risiRNAs guide the NRDE complex to nucleoli to inhibit  
91 RNAP I transcription, a process independent of H3K9 and H3K27 trimethylation.  
92 Therefore, we concluded that cells combine ribonuclease-mediated RNA degradation  
93 with small RNA-directed nucleolar RNAi system to maintain rRNA homeostasis in *C.*  
94 *elegans*.

95

## 96 **Results**

### 97 **Genetic screening identified risiRNAs that accumulated in the *susi-5(ceDis3)*** 98 **mutant.**

99 We previously described a forward genetic screen used to search for suppressors of  
100 siRNA production in *C. elegans* (Fig. 1A) [5, 14]. This screen identified a cytoplasmic  
101 localized exoribonuclease SUSI-1(*ceDIS3L2*) and a number of rRNA modifying and  
102 processing enzymes (Fig. 1B). Here, we report that this screen identified a mutant allele,  
103 *ust56*, in *susi-5* gene that suppresses risiRNA production. In *eri-1(mg366);susi-5(ust56)*  
104 mutants, the argonaute protein NRDE-3 accumulates in the nucleus of seam cells in *C.*  
105 *elegans* (Fig. 1C). NRDE-3 transports siRNAs from the cytoplasm to the nucleus.  
106 NRDE-3 localizes to the nucleus when it binds to siRNAs but accumulates in the  
107 cytoplasm in the absence of siRNA ligands, as observed in the *eri-1* mutant [21]. The  
108 subcellular localization of NRDE-3 makes it a useful tool to monitor the abundance of  
109 cellular siRNAs [21]. The production of risiRNAs in *susi* mutants triggers the  
110 accumulation of NRDE-3 in the nucleus and nucleoli in an *eri-1*-independent manner  
111 [5, 14]. We deep sequenced small RNAs in control animals and the *susi-5(ust56)* mutant  
112 and observed an increase in risiRNAs (Fig. S1A).

113



114 To determine the molecular identity of *susi-5*, we mapped *susi-5(ust56)* to the open  
115 reading frame C04G2.6 by SNP mapping followed by genome resequencing. C04G2.6  
116 is predicted to encode a protein that is homologous to yeast DIS3 and human RRP44  
117 and engages in pre-rRNA surveillance [22]. C04G2.6 has a PIN domain, two cold shock  
118 domains (CSD), an RNB domain and S1 domain (Fig. S1B). While the CSDs and the  
119 S1 domains contribute to RNA binding, both the RNB and PIN domains are responsible  
120 for RNA degradation [23]. In the *ust56* allele, a conserved amino acid in the cold shock  
121 domain, Arg363, was mutated to cysteine. We acquired one additional allele,  
122 *c04g2.6(ok357)*, from the Caenorhabditis Genetics Center (CGC). NRDE-3 also  
123 accumulates in the nucleus of seam cells in the *eri-1(mg366);dis-3(ok357)* strain (Fig.  
124 1C). An ectopically expressed mCherry::C04G2.6 transgene rescued the cytoplasmic  
125 localization of NRDE-3 in *eri-1(mg366);susi-5(ust56)* animals (Fig. S1C). Thus, we  
126 concluded that *susi-5* is *dis-3*, and the name *dis-3* is used hereafter. The *ok357* mutation  
127 deletes the PIN and two CSD domains and is a null allele (Fig. S1B). The *dis-3(ok357)*  
128 mutant is arrested at the L1 stage and has no progeny (Fig. S1D). However, the *dis-*  
129 *3(ust56)* strain is fertile, and approximately 180 progeny are produced per  
130 hermaphrodite at 20°C, suggesting that the R363C mutation partially disrupts DIS-3  
131 function. In addition, *dis-3(ust56)* is a temperature sensitive allele. At 25°C, the *dis-*  
132 *3(ust56)* mutant is sterile. In this study, we used *dis-3(ust56)* as the reference allele.

133

134 To confirm that NRDE-3 associates with risiRNAs in *dis-3* mutants, we  
135 immunoprecipitated NRDE-3 from *dis-3(ust56)* mutant animals and deep sequenced  
136 NRDE-3-associated small RNAs. risiRNAs are enriched in *dis-3(ust56)* mutants  
137 compared to the level found in control strains (Figs. 1D and S2A). risiRNAs belong to  
138 the 22G-RNA category in *C. elegans*. The majority of risiRNAs start with a guanosine  
139 at the 5'-end and are 22 nt in length (Fig. 1E). The generation of risiRNAs requires two  
140 RNA-dependent RNA polymerases, RRF-1 and RRF-2, which are essential for the  
141 production of 22G-RNAs (Fig. S2B). In *rrf-1;rrf-2* double mutants, NRDE-3 binds  
142 substantially fewer risiRNAs (Figs. 1E and S2A) and accumulates in the cytoplasm (Fig.  
143 1F). The presence of risiRNAs decreased the fertility of *C. elegans*. While the *dis-*

144 *3(ust56)* mutation reduced the *eri-1(mg366);dis-3(ust56)* brood size, the *rrf-1* and *rrf-*  
145 *2* mutations partially restored the strain fecundity (Fig. 1G).

146

#### 147 **risiRNA accumulated in the exosome mutants.**

148 DIS-3 is a core factor of the RNA exosome, which is a 3' to 5' exoribonuclease  
149 complex containing a 9-protein catalytically inactive core complex (EXO-9) and two  
150 catalytic active subunits, EXOS-10 and DIS-3 (Fig. 2A) [22]. EXO-9 forms a double-  
151 layered barrel-like structure that comprises six ribonuclease (RNase) pleckstrin  
152 homology (PH)-like proteins (EXOS-4.1, EXOS-4.2, CRN-5, EXOS-7, EXOS-8, and  
153 EXOS-9) and three S1/K homology (KH) “cap” proteins (EXOS-1, EXOS-2, and  
154 EXOS-3). All these factors are conserved from yeast to humans. Most of the RNA  
155 exosome subunits are essential, and loss-of-function mutations in them lead to larval  
156 development arrest or animal sterility at 20°C (Fig. S3A) [14]. To determine whether  
157 other components of the exosome complex, in addition to DIS-3, is involved in  
158 suppressing risiRNA production, we acquired mutants of the other exosome subunits,  
159 *exos-2(tm6653)*, *exos-3(tm6844)*, *exos-4.1(tm5568)*, *exos-9(ok1635)* and *exos-*  
160 *10(ok2269)* from the National Bioresource Project and the CGC, and generated *exos-*  
161 *1(ust57)*, *exos-5(ust61)*, *exos-7(ust62)* and *exos-8(ust60)* by CRISPR/Cas9-mediated  
162 gene deletion (Fig. S3B-J). In all of the mutants, NRDE-3 accumulates in the nucleus  
163 in seam cells (Fig. 2B). We deep sequenced total small RNAs and NRDE-3-associated  
164 small RNAs in control animals and *eri-1(mg366);exos-1(ust57)* and *eri-*  
165 *1(mg366);exos-10(ok2269)* mutants and observed an increase in both total risiRNAs  
166 and NRDE-3-associated risiRNAs (Fig. 2C-D). Thus, we concluded that the exosome  
167 complex is involved in the suppression of risiRNA production.

168

#### 169 **risiRNA inhibites the RNA polymerase I-directed transcription.**

170 We further investigated the molecular mechanism of nucleolar RNAi. Small  
171 interference RNAs guide the NRDE complex to targeted pre-mRNAs, induce H3K9,  
172 H3K23 and H3K27 trimethylation at the corresponding genomic loci, inhibit RNAP II-  
173 mediated transcription elongation, and silence gene expression in the nucleus in *C.*

174 *elegans* [19, 20, 24, 25]. To determine whether risiRNAs induce histone modifications,  
175 we conducted ChIP assays with anti-H3K9me3 and anti-H3K27me3 antibodies.  
176 However, we failed to identify a significant change in H3K9 and H3K27 trimethylation  
177 at the rDNA loci in the presence of risiRNAs (Fig. 3A). As a positive control, dsRNAs  
178 targeting the *lin-15b* gene, encoding an RNAP II transcript, induced both H3K9 and  
179 H3K27 trimethylation, as reported previously [20, 24].

180

181 To determine whether risiRNA-guided nucleolar RNAi silence rRNAs by  
182 inhibiting RNAP I-directed transcription elongation, we first generated GFP- and  
183 mCherry-tagged RPOA-2 transgene *in situ* by CRISPR/Cas9 technology. RPOA-2 is  
184 the core subunit of RNAP I and contribute to polymerase activity [26]. Knocking down  
185 RPOA-2 by RNAi caused sterility in the animals, suggesting that RPOA-2 play  
186 essential roles (Fig. S4A). RPOA-2 was enriched in the nucleoli and colocalized with  
187 the nucleoli marker FIB-1 (Figs. 3B and S4B-C), a finding that is consist with their  
188 functions in rRNA transcription. In 1- to 8-cell embryos, in which FIB-1 foci is absent,  
189 RPOA-2 was evenly distributed in the nucleus without significant nucleolar enrichment  
190 (Figs. S4C), a finding that is consistent with the idea that rDNA is not actively  
191 transcribed in early embryos. NRDE-2 is ubiquitously expressed and evenly distributed  
192 in the nucleus in *C. elegans* [19]. In the presence of risiRNAs, NRDE-2 was enriched  
193 in the nucleoli and colocalized with RPOA-2 (Figs. 3C and S4D), suggesting that  
194 risiRNA guides NRDE-2 to pre-rRNA and modulates rRNA transcription.

195

196 To further determine how risiRNAs silence rRNA expression, we validated the  
197 activity of GFP::RPOA-2 by ChIP assay. Actinomycin D is able to block the  
198 transcriptional activity of both RNAP I and RNAP II. When animals were treated with  
199 actinomycin D, RPOA-2 paused at the 5'-end of the rRNA transcription unit and failed  
200 to elongate toward the 3'-end (Fig. 4A), suggesting that the GFP::RPOA-2 fusion  
201 protein recapitulates the function of endogenous proteins. Actinomycin D treatment did  
202 not substantially change the expression level and subcellular location of RPOA-2, FIB-  
203 1, EXOS-10 and NRDE-3 (Figs. S5A-C and S6A-B).

204

205 We then investigated whether risiRNA silences rRNA expression by inhibiting  
206 RNAP I transcription elongation. We examined GFP::RPOA-2 occupancy by ChIP  
207 assay of the control animals, *dis-3* mutants, and animals being treated with RNAi  
208 targeting a fragment of 18S rRNA. In *dis-3(ust56)* mutants, GFP::RPOA-2-associated  
209 rDNA was pronouncedly decreased, a phenomenon dependent on the nuclear RNAi  
210 factor NRDE-2 (Fig. 4B). In the absence of *nrde-2*, no change in RPOA-2 occupancy  
211 was observed. Treating animals with exogenous RNAi targeting 18S rRNA had no  
212 significant effect on RPOA-2 occupancy near the site of transcription initiation and  
213 upstream of the RNAi-targeted site (Figs. 4C-D). However, we detected a decrease in  
214 RPOA-2 occupancy downstream of the RNAi-targeted region. In addition, in the  
215 absence of *nrde-2*, risiRNAs failed to reduce RPOA-2 occupancy downstream of the  
216 RNAi-targeted region. Similar inhibition of transcription elongation had been observed  
217 for RNA polymerase II transcripts during nuclear RNAi [19]. Taken together, these data  
218 suggest that risiRNAs, acting together with the nuclear RNAi machinery, may silence  
219 nascent RNAP I transcripts during the elongation phase of transcription in *C. elegans*.

220

### 221 **The nucleolar localization of exosomes was important for risiRNA suppression.**

222 To further investigate the biological roles of the exosome complex in risiRNA  
223 generation in *C. elegans*, we constructed fluorescent protein-tagged exosome subunits,  
224 including mCherry::DIS-3, GFP::EXOS-1, GFP::EXOS-2, and GFP::EXOS-10. These  
225 subunits are ubiquitously expressed in all cells and enriched in the nucleus (Figs. 5A  
226 and S7A-B). We also constructed mCherry- and GFP-tagged SUSI-2(ceRRP8), a  
227 protein previously identified as a suppressor of risiRNA production [14]. *C. elegans*  
228 SUSI-2 is the homolog of yeast protein RRP8, which exclusively localizes in the  
229 nucleolus and engages in m1A methylation of the 26S rRNA. We crossed GFP::EXOS-  
230 1 and GFP::EXOS-10 onto a mCherry::SUSI-2 background, respectively, and found  
231 that EXOS-1 and EXOS-10 were enriched in nucleoli and colocalized with SUSI-2 in  
232 somatic cells (Figs. 5B and S8A). After crossing mCherry::DIS-3 with GFP::SUSI-2  
233 animals, we found that DIS-3 was depleted from nucleoli but enriched in the

234 nucleoplasm (Figs. 5C and S8B). We crossed GFP::EXOS-1 and GFP::EXOS-10 with  
235 *dis-3(ust56)* mutants. Surprisingly, EXOS-1 and EXOS-10 were depleted from the  
236 nucleoli but enriched in the nucleoplasm (Fig. 5D).

237

238 Two lines of evidence suggested that the nucleolar localization of exosomes is  
239 important for risiRNA suppression. First, *susi-2(ceRRP8)* and T22H9.1 are known  
240 SUSI proteins and are involved in the modification and processing of rRNAs [14].  
241 Knocking down *susi-2(ceRRP8)* and T22H9.1 by RNAi induced increase of risiRNAs  
242 [14] and depletion of GFP::EXOS-10 from the nucleoli (Fig. 6A). Second, we  
243 performed a candidate-based RNAi screen to search for rRNA processing factors that  
244 are required for the nucleolar localization of GFP::EXOS-10. We selected fifteen  
245 predicted rRNA processing factors and investigated whether knocking down these  
246 genes by RNAi could block the nucleolar accumulation of EXOS-10 (Table S1). We  
247 found that knocking down *M28.5*, *nol-56*, *fib-1* and *mtr-4* by RNAi induced the  
248 depletion of EXOS-10 from the nucleoli (Fig. 6A). Among the proteins encoded by  
249 these genes, NOL-56 is an ortholog of human NOP56, which binds snoRNAs and  
250 facilitates box C/D ribonucleoprotein-guided methyltransferase activity [27]. FIB-1  
251 encodes the *C. elegans* ortholog of human fibrillarin and *Saccharomyces cerevisiae*  
252 Nop1p. FIB-1 has RNA binding and rRNA methyltransferase activities, which are  
253 essential for nucleologenesis [28]. MTR-4 is an ortholog of human MTREX and has  
254 ATP-dependent RNA helicase activity [22]. We further deleted *fib-1*, *nol-56* and *mtr-4*  
255 by CRISPR/Cas9 technology (Fig. S9A). In these mutants, NRDE-3 redistributed from  
256 the cytoplasm to the nucleus in seam cells (Fig. 6B). In addition, after knocking down  
257 these genes by RNAi, risiRNAs were enriched, as shown by small RNA deep  
258 sequencing (Fig. 6C).

259

260 These data suggest that proper nucleolar localization of the exosome complex may  
261 be important for the suppression of risiRNA production, and can be used as a tool to  
262 screen for new *susi* genes. Yet a direct causative relationship between exosome  
263 mislocalization and risiRNA production remains to be determined.

264

## 265 **Discussion**

266 Eukaryotic cells express a multitude of small regulatory RNAs and antisense  
267 transcripts that are of unknown function [29]. Small RNAs have been shown to induce  
268 endonucleolytic cleavage of target RNAs (slicer activity) or induce epigenetic  
269 modifications, including DNA and histone modifications [30]. In *C. elegans*, the  
270 nuclear argonaute protein NRDE-3 in soma (or HRDE-1 in the germline) lacks the  
271 residues required for slicer activity but inhibits RNAP II-mediated transcription  
272 elongation in the presence of siRNAs [19]. Here, we showed that risiRNAs guide the  
273 NRDE complex to pre-rRNAs to inhibit RNAP I transcription, a process independent  
274 of H3K9 and H3K27 trimethylation (Fig. 7). Thus, our data suggest a mechanism for  
275 nucleolar RNAi: risiRNA-directed cotranscriptional silencing of RNAP I. NRDE-2 is  
276 a conserved protein, which is involved in processing of pre-mRNAs in mammalian cells  
277 [31-33]. It will be of interest to investigate whether risiRNAs and RNAP I are similarly  
278 linked in other metazoans [12].

279

280 Small-RNA-guided chromatin modifications have been widely studied in many  
281 organisms. In *C. elegans*, NRDE complex transports 22G RNAs from the cytoplasm to  
282 the nucleus, induces H3K9, H3K23 and H3K27 trimethylation and mediates  
283 transgenerational inheritance of RNAi [25, 34]. In this study, we found that the  
284 risiRNA/NRDE complex inhibits RNAP I transcription without altering the status of  
285 H3K9 and H3K27 trimethylation of rDNA genes. rDNA is a multicopy gene while only  
286 a proportion of the copies are actively transcribed in many organisms [35-38]. In *S.*  
287 *cerevisiae*, actively transcribed rDNA genes are largely devoid of histone molecules  
288 and are organized in a specialized chromatin structure that binds the high-mobility  
289 group protein Hmo1 [39]. Reducing the rDNA transcription efficiency upon the  
290 depletion of *dao-5* does not induce significant change of H3K9me3 modification at  
291 rDNA region in *C. elegans* [40]. Further study to identify which types of histone  
292 modifications are engaged in rDNA silencing will facilitate the understanding of the  
293 mechanism and regulation of risiRNA-directed RNAP I inhibition.

294

295       The processing of ribosomal RNAs is extraordinarily complicated and defects may  
296 occur at every step from production to assembly and cause ribosomopathies [1, 41].  
297 Multiple surveillance machineries, including the nuclear-localized RNA exosome  
298 complex and the cytoplasmic exoribonuclease SUSI-1(*ceDIS3L2*), degrade defective  
299 rRNAs [3, 22, 42, 43]. Surveillance machinery deficiencies result in the accumulation  
300 of erroneous rRNAs. However, *C. elegans* utilizes a backup system, nucleolar RNAi,  
301 in which risiRNAs are produced to induce a nucleolar gene silencing by inhibiting  
302 RNAP I transcription. Therefore, these two systems act together to maintain rRNA  
303 homeostasis and prohibit the accumulation of erroneous rRNAs.

304

## 305 **Materials and methods**

### 306 **Strains**

307       Bristol strain N2 was used as the standard wild-type strain. All strains were grown  
308 at 20°C unless specified. The strains used in this study are listed in Supplemental Table  
309 S2.

310

### 311 **Genetic screening**

312       Genetic screen experiment was conducted as previously described [5]. Briefly, to  
313 identify the factors which negatively regulate endo-siRNA generation, we searched for  
314 mutants that redistributed NRDE-3 from the cytoplasm to the nucleus in *eri-*  
315 *1(mg366);gfp::nrde-3* animals. NRDE-3 transports siRNAs from the cytoplasm to the  
316 nucleus. NRDE-3 localizes to the nucleus when it binds to siRNAs but accumulates in  
317 the cytoplasm in the absence of siRNA ligands, for example, in the *eri-1* mutant [21].  
318 The production of risiRNAs in *susi* mutants triggers the accumulation of NRDE-3 in  
319 the nucleus and nucleoli. *eri-1(mg366);gfp::nrde-3* animals were mutagenized by ethyl  
320 methanesulfonate (EMS), followed by a clonal screen. The F2 progeny worms were  
321 visualized under fluorescence microscope at the L3/L4 stage. Mutants that redistributed  
322 NRDE-3 to the nuclei of seam cells were selected. *susi-5* was identified by snp-SNP  
323 mapping followed by the re-sequencing of the mutant genome.



324

## 325 **Construction of plasmids and transgenic strains**

326 For in situ transgene *3xflag::gfp::rpoa-2*, the 3xFLAG::GFP coding region was  
327 PCR amplified from YY174 genomic DNA with the primers 5'-  
328 ATGGACTACAAAGACCATGACGG-3' and 5'-  
329 AGCTCCACCTCCACCTCCTTTGTATAGTTCATCCATGCCATGT-3'. A 1.5kb  
330 homologous left arm was PCR amplified with the primers 5'-  
331 GGGTAACGCCAGCACGTGTGGTCAATGTCTAACAGCCAGCGAC-3' and 5'-  
332 TCATGGTCTTTGTAGTCCATTATGTGCGCAGTCCATCGCCTGA-3'. A 1.5kb  
333 homologous right arm was PCR amplified with the primers 5'-  
334 AAGGAGGTGGAGGTGGAGCTATGGACTGCGACATAGCGTCG-3' and 5'-  
335 GAGTGAGCTGATACCAGCGGATGTACTTTGGCAACTTTAACAAATTG-3'.  
336 And the backbone was PCR amplified from the plasmid pCFJ151 with the primers 5'-  
337 CACACGTGCTGGCGTTACCC-3' and 5'-CCGCTGGTATCAGCTCACTCAA-3'.  
338 All these fragments were joined together by Gibson assembly to form the  
339 *3xflag::gfp::rpoa-2* plasmid with the ClonExpress MultiS One Step Cloning Kit  
340 (Vazyme Biotech, Nanjing, China, Cat. No. C113-01/02). This plasmid was co-injected  
341 into N2 animals with three sgRNA expression vectors, *rpoa-2\_sgRNA#1*, *rpoa-2*  
342 *\_sgRNA#2*, *rpoa-2\_sgRNA#3*, 5 ng/μl pCFJ90 and Cas9 II expressing plasmid.  
343 Primer pairs for constructing sgRNA expression vectors are shown in Table S3.

344

345 For in-situ transgene *mCherry::rpoa-2*, the mCherry fragment was amplified with  
346 the primers 5'-ATGGTCTCAAAGGGTGAAGAAG-3' and 5'-  
347 ATAGCTCCACCTCCACCTCCCTTATACAATTCATCCATGCCACC-3' and the  
348 vector plasmid was amplified with the primers 5'-  
349 GGAGGTGGAGGTGGAGCTATGGACTGCGACATAGCGTC-3' from the  
350 *gfp::rpoa-2* plasmid. The two fragments were joined together by Gibson assembly to  
351 form the *mCherry::rpoa-2* repair plasmid. CRISPR plasmid mixture containing 30ng/μl  
352 *rpoa-2\_sgRNA#1*, 30ng/μl *rpoa-2\_sgRNA#2*, 30ng/μl *rpoa-2\_sgRNA#3*, 50 ng/μl  
353 Cas9 II expressing plasmid and 5 ng/μl pCFJ90 was co-injected into N2 animals.



354

355 For in-situ transgene *3xflag::gfp::nrde-2*, the *3xflag* fragment was amplified with  
356 the primers 5'-ATGGACTACAAAGACCATGAC-3' and 5'-  
357 ATAGCTCCACCTCCACCTCCTTTGTATAGTTCATCCATGCC-3' from YY174  
358 genomic DNA. A 1.5kb homologous left arm was PCR amplified with the primers 5'  
359 -GGGTAACGCCAGCACGTGTGGTCAATGTCTAACAGCCAGCGAC-3' and 5'  
360 -TCATGGTCTTTGTAGTCCATATACGCTCGAAACATTGTTTCATTA-3'. A 1.5kb  
361 homologous right arm was PCR amplified with the primers 5' -  
362 GGAGGTGGAGGTGGAGCTATGTTTCGAGCGTATGGAAATAATG-3' and 5'  
363 -GCGGATAACAATTTACCTAGATTATCCGAATCGTTTGCTAGAAC-3'. The  
364 backbone was PCR amplified with the primers 5' -  
365 TAGGTGAAATTGTTATCCGCTGG-3' and 5' -  
366 TATTTACACCGCATATGGTGC-3' from pCFJ151. All these fragments were  
367 joined together by Gibson assembly to form the *3xflag::gfp::nrde-2* plasmid. This  
368 plasmid was co-injected into N2 animals with two sgRNA expression vectors, *nrde-*  
369 *2\_sgRNA#1*, *nrde-2\_sgRNA#2* and Cas9 II expressing plasmid. Primer pairs for  
370 constructing sgRNA expression vectors are shown in Supplemental Table S3.

371

372 For the constructing of *mcherry::dis-3*, a 2kb promoter region was amplified with  
373 the primers 5'-  
374 CGACTCACTAGTGGGCAGATATCGTCGTGATTATCCATTTTTGAAAC-3' and  
375 5'-TCTTCACCCTTTGAGACCATGACGTTCAAATCCATACCTTC'. The *dis-3* CDs  
376 region and 3' UTR region were amplified as a whole fragment with the primers 5'-  
377 GGAGGTGGAGGTGGAGCTATGGATTTGAACGTCAAACAAAG-3' and 5'-  
378 GGCCTTGACTAGAGGGTACCAGCCGTCCCTATTGGATGATAAAT-3'. The  
379 *mCherry* coding sequence was amplified from PFCJ90 with 5'-  
380 AGCTCCACCTCCACCTCCCTTATAACAATTCATCCATGCC-3' and 5'-  
381 ATGGATTTGAACGTCATGGTCTCAAAGGGTGAAGAAGA-3'. The linearized  
382 backbone was amplified from PCFJ151 with primers 5'-  
383 ATCTGCCCACTAGTGAGTCG-3' and 5'-GGTACCCTCTAGTCAAGGCC-3'. The

384 transgene was integrated onto the *C. elegans*' chromosome III of the strain EG8080 by  
385 MosSCI technology [44].

386

387 For *3xflag::gfp::exos-1*, a 2kb promoter region was amplified with the primers 5'-  
388 CGACTCACTAGTGGGCAGATTGCCTGACCTTAAGGCGG-3' and 5'-  
389 TCATGGTCTTTGTAGTCCATCGTTTCGGCGAGCATTTTCT-3'. The *exos-1* CDs  
390 region and 3' UTR region was amplified as a whole fragment with the primers 5'-  
391 AAGGAGGTGGAGGTGGAGCTATGCTCGCCGAAACGCTTGT-3' and 5'-  
392 GGCCTTGACTAGAGGGTACCCAGTGAGCCCATCTCATCAT-3'. The *3xflag::gfp*  
393 coding sequence was amplified from YY174 genomic DNA with 5'-  
394 ATGCTCGCCGAAACGATGGACTACAAAGACCATGACGGTG-3' and 5'-  
395 AGCTCCACCTCCACCTCCTTTGTATAGTTCATCCATGC-3'. The linearized  
396 backbone was amplified from pCFJ151 with primers 5'-  
397 ATCTGCCCACTAGTGAGTCG-3' and 5'-GGTACCCTCTAGTCAAGGCC-3'. The  
398 transgene was integrated onto the *C. elegans*' chromosome II of the strain EG4322 by  
399 MosSCI technology.

400

401 For *3xflag::gfp::exos-2*, a 2kb promoter region was amplified with the primers 5'-  
402 CGACTCACTAGTGGGCAGATACGAGAACAATCAAAGCAACG-3' and 5'-  
403 TCATGGTCTTTGTAGTCCATGGTACTTCGAAACTCATTT-3'. The *exos-2* CDS  
404 region and 3' UTR region were amplified as a whole fragment with the primers 5'-  
405 AAGGAGGTGGAGGTGGAGCTATGAGTTTCGAAGTCACCGG-3' and 5'-  
406 GGCCTTGACTAGAGGGTACCCGGTACCAACAACCTCCAACG-3'. The  
407 *3xflag::gfp* coding sequence was amplified from YY174 genomic DNA with 5'-  
408 ATGGACTACAAAGACCATGACG-3' and 5'-  
409 AGCTCCACCTCCACCTCCTTTGTATAGTTCATCCATGCCA-3'. The linearized  
410 backbone was amplified from pCFJ151 with primers 5'-  
411 ATCTGCCCACTAGTGAGTCG-3' and 5'-GGTACCCTCTAGTCAAGGCC-3'. The  
412 transgene was integrated onto the *C. elegans*' chromosome II of the strain EG4322 by  
413 MosSCI technology.

414

415 *exos-10* locates in the operon CEOP2496. For the constructing of  
416 *3xflag::gfp::exos-10*, a 2.1kb promoter region was PCR amplified with the primers 5'-  
417 CGACTCACTAGTGGGCAGATCAACGTCCGACTTCTCGAAT-3' and 5'-  
418 CATATCTTGATAATCGTCCTCAT-3' from N2 genomic DNA. A transplced sequence  
419 was amplified with the primers 5'-  
420 AGGACGATTATCAAGATATGATGACGACATGCACTTTATA-3' and 5'-  
421 TTCTTCTCCTGACATTCTGTAAAT-3'. The 3xFLAG::GFP coding region was PCR  
422 amplified from YY174 genomic DNA with the primers 5'-  
423 ACAGAATGTCAGGAGAAGAAGACTACAAAGACCATGACGGT-3' and 5'-  
424 ATTGATTCTTCTCCTGACATAGCTCCACCTCCACCTCCT-3'. The EXOS-10  
425 coding region and 3' UTR region were PCR amplified with the primers 5'-  
426 ATGTCAGGAGAAGAATCAATGC-3' and 5'-  
427 GGCCTTGACTAGAGGGTACCTGGATCTGAAGCTTAACCTATTC-3'. The  
428 pCFJ151 vector fragment was PCR amplified with the primers 5'-  
429 GGTACCCTCTAGTCAAGGCC-3' and 5'-ATCTGCCCACTAGTGAGTCG-3' from  
430 the pCFJ151 plasmid. These five fragments were joined together by Gibson assembly  
431 to form the *gfp::exos-10* repair plasmid. The transgene was integrated onto the *C.*  
432 *elegans*' chromosome II by MosSCI technology.

433

434 For *susi-2::mCherry*, the promoter region was PCR amplified with the primers 5'-  
435 CCTGTCAATTCCCAAATACTTGAAAGCATTTCAGGCG-3' and 5'-  
436 GAAAATTCAACGGAATGCTCTGAAATTGTTAACACAGATGATAAAAG-3'  
437 and the coding region was PCR amplified with the primers 5'-  
438 AGCATTCCGTTGAATTTTCGCTG-3' and 5'-  
439 CAGCTCCACCTCCACCTCCGCGTTTCTTATACAAACAAGGC-3' from N2  
440 genomic DNA respectively. The mCherry fragment was PCR amplified with the  
441 primers 5'-CGGAGGTGGAGGTGGAGCTGTCTCAAAGGGTGAAGAAGATAAC-  
442 3' and 5'-ACAAAAAATCAAAAAATCACTTATACAATTCATCCATGCCACC-3'  
443 from the plasmid pCFJ90. The primers 5'-TGATTTTTTGATTTTTTGTTGATT-3'

444 and 5'- TTCAAAGAAATCGCCGACTTCAATCGCTCTCAACGTTTCTG-3' were  
445 used to generate the 3' UTR region of *susi-2*. The vector fragment was PCR amplified  
446 with the primers 5'-  
447 AGAAACGTTGAGAGCGATTGGTGAGTTCCAATTGATAATTGTGAT-3' and 5'-  
448 GTATTTTGGGAATTGACAGGG-3' from plasmid pSG274. These five fragments  
449 were joined together by Gibson assembly to form the *susi-2::mCherry* repair plasmid.  
450 The transgene was integrated onto the *C. elegans*' chromosome II via a modified  
451 counterselection (cs)-CRISPR method [45].

452

453 The sgRNAs used in this study for transgene construction are listed in  
454 Supplemental Table S3.

455

#### 456 **CRISPR/Cas9-mediated gene deletion**

457 Multiple sgRNAs-guided chromosome deletion was conducted as previously  
458 described [46]. To construct sgRNA expression plasmids, the 20 bp *unc-119* sgRNA  
459 guide sequence in the pU6::*unc-119* sgRNA(F+E) vector was replaced with different  
460 sgRNA guide sequences as described previously. Addgene plasmid #47549 was used to  
461 express Cas9 II protein. Plasmid mixtures containing 30 ng/μl of each of the three  
462 sgRNA expression vectors, 50 ng/μl Cas9 II expressing plasmid, and 5 ng/μl pCFJ90  
463 were co-injected into YY178: *eri-1(mg366);3xflag::gfp::nrde-3(ggIS1)* animals. The  
464 deletion mutants were screened by PCR amplification and confirmed by sequencing.  
465 The sgRNAs used in this study are listed in Supplemental Table S3.

466

#### 467 **RNAi**

468 RNAi experiments were conducted as previously described [47]. HT115 bacteria  
469 expressing the empty vector L4440 (a gift from A. Fire) was used as controls. Bacterial  
470 clones expressing dsRNA were obtained from the Ahringer RNAi library and were  
471 sequenced to verify their identity. The 18S RNAi #1 clone with dsRNA targeting the  
472 18S rRNA was PCR amplified with the primer pairs 5'-  
473 CGCAATTTGCGTCAACTGTGG-3' and 5'-TCTTCTCGAATCAGTTCAGTCC-3'

474 from N2 genomic DNA. The L4440 vector fragment was amplified with the primer 5'-  
475 ACTGAACTGATTCGAGAAGActtgatatcgaattcctgcagc-3' and 5'-  
476 CACAGTTGACGCAAATTGCGCTTATCGATACCGTCGACCTC-3'. These two  
477 fragments were joined together to generate the dsRNA expression plasmid targeting  
478 18S rRNA. The 18S RNAi #2 clone with dsRNA targeting the 18S rRNA was PCR  
479 amplified with the primer pairs 5'- TCTATCCGGAAAGGGTGTCTGC-3' and 5'-  
480 CACTCCACCAACTAAGAACGGC-3' from N2 genomic DNA. The L4440 vector  
481 fragment was amplified with the primer 5'-  
482 CGTTCTTAGTTGGTGGAGTGcttgatatcgaattcctgcagcc-3' and 5'-  
483 AGACACCCTTCCGGATAGActtatcgataccgtgacctcga-3'. These two fragments  
484 were joined together to generate the dsRNA expression plasmid targeting 18S rRNA.

485

#### 486 **Chromatin immunoprecipitation (ChIP)**

487 ChIP experiments of H3K9me3 or H3K27me3 were performed as previously  
488 described with hypochlorite-isolated embryos [20]. Briefly, after crosslinking, samples  
489 were sonicated 23 cycles (each cycle: 30 seconds on and 30 seconds off) with a  
490 Bioruptor UCD-200 (Diagenode). Lysates were precleared with agarose beads (BBI no.  
491 C600957-0005) and then immunoprecipitated with 2  $\mu$ l anti-trimethylated H3K9  
492 antibody (Millipore no. 07-523) or 2  $\mu$ l anti-trimethylated H3K27 antibody (Millipore  
493 no. 07-449). ChIP signals were normalized to levels of *eft-3* and the data were expressed  
494 as ratios of indicated animals exposed to  $\pm$  dsRNA.

495

496 For Pol I transcription, ChIP experiments were performed with hypochlorite-  
497 isolated young adults. After cross-linking, samples were resuspended in FA buffer (50  
498 mM Tris/HCl at pH 7.5, 1 mM EDTA, 1% Triton X-100, 0.1% sodium deoxycholate,  
499 150 mM NaCl) containing proteinase inhibitor tablet (Roche, 04693116001) and  
500 sonicated for 23 cycles at medium output (each cycle: 30 seconds on and 30 seconds  
501 off) with a Bioruptor 200. Lysates were precleared and then immunoprecipitated with  
502 1.5  $\mu$ L of anti-GFP antibody (Abcam, ab290) for GFP::*RPOA-2* overnight at 4°C.  
503 Antibody-bound complexes were recovered with Dynabeads Protein A. DNA was

504 treated with RNase (Roche) and Proteinase K (New England Biolabs).

505

506 Quantitative real-time PCR (qPCR) was performed using an MyIQ2 machine (Bio-  
507 Rad) with SYBR Green Master Mix (Vazyme, Q111-02). The primers used in this work  
508 are listed in Table S4.

509

### 510 **Deep sequencing of small RNAs and bioinformatic analysis**

511 Deep sequencing of small RNAs and bioinformatic analysis were conducted as  
512 previously described [14]. Briefly, total RNAs were isolated from L3 stage worm using  
513 a dounce homogenizer (pestle B) in TRIzol solution (Invitrogen) followed by DNase I  
514 digestion (Fermentas, no. 18068015). 3xFLAG::GFP::NRDE-3-associated siRNAs  
515 were isolated from L3 stage worm lysates as described previously [5, 21]. The lysate  
516 was pre-cleared with protein G-agarose beads (Roche) and incubated with anti-FLAG  
517 M2 agarose beads (Sigma #A2220). The beads were washed extensively and were  
518 eluted with 100 µg/ml 3xFLAG peptide (Sigma). The eluates were incubated with  
519 TRIzol reagent followed by isopropanol precipitation and DNase I digestion  
520 (Fermentas). To facilitate 5'-phosphate-independent deep sequencing, the precipitated  
521 RNAs were treated with calf intestinal alkaline phosphatase (CIAP, Invitrogen), re-  
522 extracted with TRIzol, and treated with T4 polynucleotide kinase (T4 PNK, New  
523 England Biolabs) in the presence of 1 mM ATP.

524

525 Small RNAs were subjected to deep sequencing using an Illumina platform  
526 (Novogene Bioinformatics Technology Co., Ltd). Briefly, small RNAs ranging from 18  
527 to 30 nt were gel-purified and ligated to a 3' adaptor (5'-  
528 pUCGUAUGCCGUCUUCUGCUUGidT-3'; p, phosphate; idT, inverted  
529 deoxythymidine) and a 5' adaptor (5'-GUUCAGAGUUCUACAGUCCGACGAUC-3').  
530 The ligation products were gel-purified, reverse transcribed, and amplified using  
531 Illumina's sRNA primer set (5'-CAAGCAGAAGACGGCATAACGA-3'; 5'-  
532 AATGATACGGCGACCACCGA-3'). The samples were then sequenced using an  
533 Illumina Hiseq platform.

534

535 The Illumina-generated raw reads were first filtered to remove adaptors, low  
536 quality tags and contaminants to obtain clean reads at Novogene. Clean reads ranging  
537 from 18 to 30 nt were mapped to the unmasked *C. elegans* genome and the  
538 transcriptome assembly WS243, respectively, using Bowtie2 [48] with default  
539 parameters. The number of reads targeting each transcript was counted using custom  
540 Perl scripts and displayed by IGV [49]. The number of total reads mapped to the  
541 genome minus the number of total reads corresponding to sense rRNA transcripts (5S,  
542 5.8S, 18S, and 26S) and sense protein coding mRNA reads was used as the  
543 normalization number to exclude the possible degradation fragments of sense rRNAs  
544 and mRNAs.

545

#### 546 **Actinomycin D treatment**

547 Actinomycin D (MedChemExpress no. HY-17559, CAS:50-76-0) was prepared to  
548 20 mg/ml in DMSO as stock solution. The actinomycin D stock solution was diluted to  
549 5 µg/ml or 10 µg/ml with concentrated OP50. NGM plates were prepared and placed at  
550 room temperature overnight before use. Embryos were placed onto the seeded plates  
551 and grown to young adults before collection for ChIP.

552

#### 553 **Imaging**

554 Images were collected using Leica DM4 microscopes.

555

#### 556 **Statistics**

557 Bar graphs with error bars are presented with mean and standard deviation. All of  
558 the experiments were conducted with independent *C. elegans* animals for the indicated  
559 N times. Statistical analysis was performed with two-tailed Student's t-test.

560

#### 561 **Data availability**

562 All raw and normalized sequencing data have been deposited to Gene Expression  
563 Omnibus under submission number GSE.

564

565

566 **Acknowledgments.** We are grateful to the members of the Guang lab for their  
567 comments. We are grateful to the International *C. elegans* Gene Knockout Consortium,  
568 and the National Bioresource Project for providing the strains. Some strains were  
569 provided by the CGC, which is funded by NIH Office of Research Infrastructure  
570 Programs (P40 OD010440). This work was supported by grants from the National Key  
571 R&D Program of China (2018YFC1004500, 2019YFA0802600, and  
572 2017YFA0102900), the National Natural Science Foundation of China (31671346,  
573 91940303, 31870812, 32070619, 31871300 and 31900434), the China Postdoctoral  
574 Science Foundation (2018M632542), Anhui Natural Science Foundation  
575 (1808085QC82 and 1908085QC96), the Strategic Priority Research Program of the  
576 Chinese Academy of Sciences (XDB39010000), and CAS Interdisciplinary Innovation  
577 Team. This study was supported, in part, by the Fundamental Research Funds for the  
578 Central Universities.

579

### 580 **Author Contributions**

581 C.Z., S.G. and X.F. designed research; S.L., X.C., T.X., Q.J., Z.X., D.X., and X.Z.  
582 performed the research and analyzed data; S.G. and X.F. wrote the paper.

583

584 **Declaration of Interests.** The authors declare no competing financial interests.

585

### 586 **References and Notes**

- 587 1. Klinge, S., and Woolford, J.L. (2019). Ribosome assembly coming into focus. *Nature Reviews*  
588 *Molecular Cell Biology* *20*, 116-131.
- 589 2. Woolford, J.L., Jr., and Baserga, S.J. (2013). Ribosome biogenesis in the yeast *Saccharomyces*  
590 *cerevisiae*. *Genetics* *195*, 643-681.
- 591 3. Houseley, J., LaCava, J., and Tollervey, D. (2006). RNA-quality control by the exosome. *Nat Rev*  
592 *Mol Cell Biol* *7*, 529-539.
- 593 4. Kilchert, C., Wittmann, S., and Vasiljeva, L. (2016). The regulation and functions of the nuclear  
594 RNA exosome complex. *Nat Rev Mol Cell Biol* *17*, 227-239.
- 595 5. Zhou, X., Feng, X., Mao, H., Li, M., Xu, F., Hu, K., and Guang, S. (2017). RdRP-synthesized  
596 antisense ribosomal siRNAs silence pre-rRNA via the nuclear RNAi pathway. *Nat Struct Mol Biol*



- 597 24, 258-269.
- 598 6. Ustianenko, D., Pasulka, J., Feketova, Z., Bednarik, L., Zigackova, D., Fortova, A., Zavolan, M.,  
599 and Vanacova, S. (2016). TUT-DIS3L2 is a mammalian surveillance pathway for aberrant  
600 structured non-coding RNAs. *EMBO J* 35, 2179-2191.
- 601 7. Buhler, M., Spies, N., Bartel, D.P., and Moazed, D. (2008). TRAMP-mediated RNA surveillance  
602 prevents spurious entry of RNAs into the *Schizosaccharomyces pombe* siRNA pathway. *Nat*  
603 *Struct Mol Biol* 15, 1015-1023.
- 604 8. Xie, Z., Johansen, L.K., Gustafson, A.M., Kasschau, K.D., Lellis, A.D., Zilberman, D., Jacobsen, S.E.,  
605 and Carrington, J.C. (2004). Genetic and functional diversification of small RNA pathways in  
606 plants. *PLoS Biol* 2, E104.
- 607 9. Pontes, O., Li, C.F., Nunes, P.C., Haag, J., Ream, T., Vitins, A., Jacobsen, S.E., and Pikaard, C.S.  
608 (2006). The *Arabidopsis* chromatin-modifying nuclear siRNA pathway involves a nucleolar RNA  
609 processing center. *Cell* 126, 79-92.
- 610 10. Earley, K.W., Pontvianne, F., Wierzbicki, A.T., Blevins, T., Tucker, S., Costa-Nunes, P., Pontes, O.,  
611 and Pikaard, C.S. (2010). Mechanisms of HDA6-mediated rRNA gene silencing: suppression of  
612 intergenic Pol II transcription and differential effects on maintenance versus siRNA-directed  
613 cytosine methylation. *Genes Dev* 24, 1119-1132.
- 614 11. Cao, M., Du, P., Wang, X., Yu, Y.Q., Qiu, Y.H., Li, W., Gal-On, A., Zhou, C., Li, Y., and Ding, S.W.  
615 (2014). Virus infection triggers widespread silencing of host genes by a distinct class of  
616 endogenous siRNAs in *Arabidopsis*. *Proc Natl Acad Sci U S A* 111, 14613-14618.
- 617 12. You, C., He, W., Hang, R., Zhang, C., Cao, X., Guo, H., Chen, X., Cui, J., and Mo, B. (2019). FIERY1  
618 promotes microRNA accumulation by suppressing rRNA-derived small interfering RNAs in  
619 *Arabidopsis*. *Nat Commun* 10, 4424.
- 620 13. Lee, H.C., Chang, S.S., Choudhary, S., Aalto, A.P., Maiti, M., Bamford, D.H., and Liu, Y. (2009).  
621 qiRNA is a new type of small interfering RNA induced by DNA damage. *Nature* 459, 274-277.
- 622 14. Zhu, C., Yan, Q., Weng, C., Hou, X., Mao, H., Liu, D., Feng, X., and Guang, S. (2018). Erroneous  
623 ribosomal RNAs promote the generation of antisense ribosomal siRNA. *Proc Natl Acad Sci U S*  
624 *A* 115, 10082-10087.
- 625 15. Wang, Y., Weng, C., Chen, X., Zhou, X., Huang, X., Yan, Y., and Zhu, C. (2020). CDE-1 suppresses  
626 the production of risiRNA by coupling polyuridylation and degradation of rRNA. *BMC Biol* 18,  
627 115.
- 628 16. Zhou, X., Chen, X., Wang, Y., Feng, X., and Guang, S. (2017). A new layer of rRNA regulation by  
629 small interference RNAs and the nuclear RNAi pathway. *RNA Biol*, 0.
- 630 17. Billi, A.C., Fischer, S.E., and Kim, J.K. (2014). Endogenous RNAi pathways in *C. elegans*.  
631 *WormBook*, 1-49.
- 632 18. Castel, S.E., and Martienssen, R.A. (2013). RNA interference in the nucleus: roles for small RNAs  
633 in transcription, epigenetics and beyond. *Nat Rev Genet* 14, 100-112.
- 634 19. Guang, S., Bochner, A.F., Burkhart, K.B., Burton, N., Pavelec, D.M., and Kennedy, S. (2010). Small  
635 regulatory RNAs inhibit RNA polymerase II during the elongation phase of transcription. *Nature*  
636 465, 1097-1101.
- 637 20. Mao, H., Zhu, C., Zong, D., Weng, C., Yang, X., Huang, H., Liu, D., Feng, X., and Guang, S. (2015).  
638 The Nrde Pathway Mediates Small-RNA-Directed Histone H3 Lysine 27 Trimethylation in  
639 *Caenorhabditis elegans*. *Curr Biol* 25, 2398-2403.
- 640 21. Guang, S., Bochner, A.F., Pavelec, D.M., Burkhart, K.B., Harding, S., Lachowicz, J., and Kennedy,

- 641 S. (2008). An Argonaute transports siRNAs from the cytoplasm to the nucleus. *Science* 321,  
642 537-541.
- 643 22. Morton, D.J., Kuiper, E.G., Jones, S.K., Leung, S.W., Corbett, A.H., and Fasken, M.B. (2018). The  
644 RNA exosome and RNA exosome-linked disease. *RNA* 24, 127-142.
- 645 23. Robinson, S.R., Oliver, A.W., Chevassut, T.J., and Newbury, S.F. (2015). The 3' to 5'  
646 Exoribonuclease DIS3: From Structure and Mechanisms to Biological Functions and Role in  
647 Human Disease. *Biomolecules* 5, 1515-1539.
- 648 24. Kalinava, N., Ni, J.Z., Peterman, K., Chen, E., and Gu, S.G.P. (2017). Decoupling the downstream  
649 effects of germline nuclear RNAi reveals that H3K9me3 is dispensable for heritable RNAi and  
650 the maintenance of endogenous siRNA-mediated transcriptional silencing in *Caenorhabditis*  
651 *elegans*. *Epigenetics & Chromatin* 10.
- 652 25. Schwartz-Orbach, L., Zhang, C., Sidoli, S., Amin, R., Kaur, D., Zhebrun, A., Ni, J., and Gu, S.G.  
653 (2020). *Caenorhabditis elegans* nuclear RNAi factor SET-32 deposits the transgenerational  
654 histone modification, H3K23me3. *Elife* 9.
- 655 26. Iarovaia, O.V., Minina, E.P., Sheval, E.V., Onichtchouk, D., Dokudovskaya, S., Razin, S.V., and  
656 Vassetzky, Y.S. (2019). Nucleolus: A Central Hub for Nuclear Functions. *Trends Cell Biol* 29, 647-  
657 659.
- 658 27. Yu, G., Zhao, Y., and Li, H. (2018). The multistructural forms of box C/D ribonucleoprotein  
659 particles. *RNA* 24, 1625-1633.
- 660 28. Lee, L.W., Lee, C.C., Huang, C.R., and Lo, S.J. (2012). The nucleolus of *Caenorhabditis elegans*. *J*  
661 *Biomed Biotechnol* 2012, 601274.
- 662 29. Ghildiyal, M., and Zamore, P.D. (2009). Small silencing RNAs: an expanding universe. *Nature*  
663 *Reviews Genetics* 10, 94-108.
- 664 30. Holoch, D., and Moazed, D. (2015). RNA-mediated epigenetic regulation of gene expression.  
665 *Nature Reviews Genetics* 16, 71-84.
- 666 31. Jiao, A.L., Perales, R., Umbreit, N.T., Haswell, J.R., Piper, M.E., Adams, B.D., Pellman, D., Kennedy,  
667 S., and Slack, F.J. (2019). Human nuclear RNAi-defective 2 (NRDE2) is an essential RNA splicing  
668 factor. *Rna* 25, 352-363.
- 669 32. Wang, J.S., Chen, J.Y., Wu, G.F., Zhang, H.L., Du, X., Chen, S.L., Zhang, L., Wang, K., Fan, J., Gao,  
670 S.X., et al. (2019). NRDE2 negatively regulates exosome functions by inhibiting MTR4  
671 recruitment and exosome interaction. *Genes & Development* 33, 536-549.
- 672 33. Richard, P., Ogami, K., Chen, Y.Q., Feng, S., Moresco, J.J., Yates, J.R., and Manley, J.L. (2018).  
673 NRDE-2, the human homolog of fission yeast Nrl1, prevents DNA damage accumulation in  
674 human cells. *Rna Biology* 15, 868-876.
- 675 34. Feng, X., and Guang, S. (2013). Small RNAs, RNAi and the inheritance of gene silencing in  
676 *Caenorhabditis elegans*. *J Genet Genomics* 40, 153-160.
- 677 35. Pontvianne, F., Blevins, T., Chandrasekhara, C., Mozgova, I., Hassel, C., Pontes, O.M., Tucker, S.,  
678 Mokros, P., Muchova, V., Fajkus, J., et al. (2013). Subnuclear partitioning of rRNA genes  
679 between the nucleolus and nucleoplasm reflects alternative epiallelic states. *Genes Dev* 27,  
680 1545-1550.
- 681 36. Sanij, E., and Hannan, R.D. (2009). The role of UBF in regulating the structure and dynamics of  
682 transcriptionally active rDNA chromatin. *Epigenetics* 4, 274-281.
- 683 37. Dammann, R., Lucchini, R., Koller, T., and Sogo, J.M. (1993). Chromatin structures and  
684 transcription of rDNA in yeast *Saccharomyces cerevisiae*. *Nucleic Acids Res* 21, 2331-2338.

- 685 38. Bersaglieri, C., and Santoro, R. (2019). Genome Organization in and around the Nucleolus. *Cells*  
686 8.
- 687 39. Merz, K., Hondele, M., Goetze, H., Gmelch, K., Stoeckl, U., and Griesenbeck, J. (2008). Actively  
688 transcribed rRNA genes in *S. cerevisiae* are organized in a specialized chromatin associated  
689 with the high-mobility group protein Hmo1 and are largely devoid of histone molecules. *Genes*  
690 *Dev* 22, 1190-1204.
- 691 40. Lee, C.C., Tsai, Y.T., Kao, C.W., Lee, L.W., Lai, H.J., Ma, T.H., Chang, Y.S., Yeh, N.H., and Lo, S.J.  
692 (2014). Mutation of a Nopp140 gene *dao-5* alters rDNA transcription and increases germ cell  
693 apoptosis in *C. elegans*. *Cell Death Dis* 5, e1158.
- 694 41. Mills, E.W., and Green, R. (2017). Ribosomopathies: There's strength in numbers. *Science* 358.
- 695 42. Karbstein, K. (2013). Quality control mechanisms during ribosome maturation. *Trends in Cell*  
696 *Biology* 23, 242-250.
- 697 43. Pirouz, M., Munafo, M., Ebrahimi, A.G., Choe, J., and Gregory, R.I. (2019). Exonuclease  
698 requirements for mammalian ribosomal RNA biogenesis and surveillance. *Nature Structural &*  
699 *Molecular Biology* 26, 490-500.
- 700 44. Frokjaer-Jensen, C., Davis, M.W., Hopkins, C.E., Newman, B.J., Thummel, J.M., Olesen, S.P.,  
701 Grunnet, M., and Jorgensen, E.M. (2008). Single-copy insertion of transgenes in *Caenorhabditis*  
702 *elegans*. *Nat Genet* 40, 1375-1383.
- 703 45. Chen, X.Y., Liao, S.M., Huang, X.Y., Xu, T., Feng, X.Z., and Guang, S.H. (2018). Targeted  
704 Chromosomal Rearrangements via Combinatorial Use of CRISPR/Cas9 and Cre/LoxP  
705 Technologies in *Caenorhabditis elegans*. *G3-Genes Genomes Genetics* 8, 2697-2707.
- 706 46. Chen, X.Y., Xu, F., Zhu, C.M., Ji, J.J., Zhou, X.F., Feng, X.Z., and Guang, S.H. (2014). Dual sgRNA-  
707 directed gene knockout using CRISPR/Cas9 technology in *Caenorhabditis elegans*. *Scientific*  
708 *Reports* 4.
- 709 47. Timmons, L., Court, D.L., and Fire, A. (2001). Ingestion of bacterially expressed dsRNAs can  
710 produce specific and potent genetic interference in *Caenorhabditis elegans*. *Gene* 263, 103-  
711 112.
- 712 48. Langmead, B., and Salzberg, S.L. (2012). Fast gapped-read alignment with Bowtie 2. *Nature*  
713 *Methods* 9, 357-U354.
- 714 49. Thorvaldsdottir, H., Robinson, J.T., and Mesirov, J.P. (2013). Integrative Genomics Viewer (IGV):  
715 high-performance genomics data visualization and exploration. *Briefings in Bioinformatics* 14,  
716 178-192.

717

718

719

## 720 **Supporting online materials**

721 Figs. S1 to S9

722 Tables S1 to S4

723

724

725 **Figure legends:**

726 **Fig. 1.** A genetic screen identified the accumulation of antisense ribosomal siRNA  
727 (risiRNA) in the *dis-3* mutant. (A) The subcellular localization of NRDE-3 was used as  
728 an indicator to screen for suppressors of mutants in endo-siRNA generation. cyt.,  
729 cytoplasm; nuc., nucleus. (B) Summary of *susi* genes identified by forward genetic  
730 screening in *C. elegans* [5, 14]. Numbers indicate the size of each chromosome. (C)  
731 Images show seam cells of the indicated genotype expressing GFP::NRDE-3. Numbers  
732 indicate the percentage of animals with nucleus-enriched NRDE-3 in seam cells (% N).  
733 The number of scored animals is indicated in parentheses. Scale bars, 5  $\mu$ m. (D) Results  
734 of the deep sequencing of NRDE-3-associated siRNAs from the indicated animals. The  
735 green dashed lines indicate risiRNAs. (E) Size distribution and 5'-end nucleotide  
736 preference of NRDE-3-associated risiRNAs in indicated animals. (F) Images show  
737 seam cells of the respective genotype expressing GFP::NRDE-3, labeled as in (C).  
738 Scale bars, 5  $\mu$ m. (G) Brood size of indicated animals grown at 20°C. Data are presented  
739 as the mean  $\pm$  s.d.;  $n \geq 15$  animals; \*\*P < 0.01.

740

741 **Fig. 2.** risiRNAs are enriched in exosome mutants. (A) Schematics of the RNA  
742 exosome complex and the subunits in *C. elegans*. (B) Images show seam cells of the  
743 respective genotype expressing GFP::NRDE-3. Numbers indicate the percentage of  
744 animals with nucleus-enriched NRDE-3 in seam cells (% N). The number of scored  
745 animals is indicated in parentheses. Scale bars, 5  $\mu$ m. Schematics of the alleles are  
746 shown in Fig. S3. (C) Results from the deep sequencing of total small RNAs from the  
747 indicated animals. The green dashed lines indicate risiRNAs. (D) Results from the deep  
748 sequencing of NRDE-3-associated siRNAs from the indicated animals.

749

750 **Fig. 3.** risiRNA directs NRDE-2 to the transcription site of rRNAs. (A) ChIP analysis  
751 of rDNA loci upon treatment of RNAi targeting the *lin-15b* gene or 18S rRNA. (top)  
752 Schematic of the rDNA transcription unit and real time PCR primers. The red bar  
753 indicates the dsRNA segment targeting 18S rRNA. Trimethylation of H3K9 and H3K27  
754 (bottom) were measured by ChIP assay. Data are presented as mean  $\pm$  s.d.;  $n = 3$ .  
755 \* $p < 0.05$ , \*\*\* $p < 0.0001$ , n.s., not significant. (B) Images of *C. elegans* embryos

756 expressing GFP:RPOA-2 (green) and mCherry::FIB-1 (red). (C) Images of *C. elegans*  
757 embryos expressing GFP:NRDE-2 (green) and mCherry::RPOA-2 (red) after the  
758 animals were treated with RNAi targeting 18S rRNA. Scale bars, 10  $\mu$ m.

759

760 **Fig. 4.** risiRNA directs a NRDE-2-dependent inhibition of RNAP I transcription. (A)  
761 ChIP assay of RPOA-2 occupancy upon actinomycin D treatment. Fold changes were  
762 normalized to 1% input first, and then compared to the no-drug treatment group. Mean  
763  $\pm$  s.d.; n = 4; \*P<0.05 and \*\*P<0.01. (B) Results of the ChIP assay of RPOA-2  
764 occupancy in the indicated animals. The enrichment of each sample was first  
765 normalized to 1% input. And then fold changes were calculated by dividing the  
766 enrichment of *dis-3(ust56)* mutants by the number of control animals. Statistics were  
767 analyzed by comparing the data from the *nrde-2(+)* and *nrde-2(-)* animals. mean  $\pm$  s.d.;  
768 n = 4; \*P<0.05, \*\*P<0.01. (C, D) RPOA-2 occupancy along the rDNA unit was  
769 quantified by ChIP-qPCR upon RNAi targeting of 18S rRNA regions to indicated  
770 animals. Statistics were analyzed by comparing the data obtained for the *nrde-2(+)* and  
771 *nrde-2(-)* animals; mean  $\pm$  s.d.; n = 5; \*P < 0.05 and \*\* P < 0.01.

772

773 **Fig. 5.** *dis-3(ust56)* mutation mislocalized exosome components from the nucleoli to  
774 nucleoplasm. (A) Images of 1-to-8 cell embryos from the animals expressing indicated  
775 transgenes. Scale bars, 10  $\mu$ m. (B) Images show somatic cells of animals expressing  
776 GFP::EXOS-1 (green), GFP::EXOS-10 (green) and mCherry::SUSI-2 (red). Animals  
777 were grown at 20°C. Scale bars, 10  $\mu$ m. (C) Images show somatic cells of the animals  
778 expressing GFP::SUSI-2 (green) and mCherry::DIS-3 (red). Scale bars, 10  $\mu$ m. (D) (top)  
779 Images of somatic cells of the indicated animals. Scale bars, 10  $\mu$ m. (bottom)  
780 Quantification of the nucleolar localization of GFP::EXOS-1 and GFP::EXOS-10.  
781 mean  $\pm$  s.d.; n > 70 animals; \*\*P < 0.01.

782

783 **Fig. 6.** A proper nucleolar localization of the exosome complex is important for risiRNA  
784 suppression. (A) Images of somatic cells of the animals expressing GFP::EXOS-10  
785 after being treated with RNAi targeting the indicated genes. The percentage of animals

786 with nucleolar localized GFP::EXOS-10 is indicated (% NCL). The number of scored  
787 animals is indicated in parentheses. Scale bars, 10  $\mu$ m. Animals were grown at 20°C.  
788 (B) Images of seam cells from the indicated animals. Numbers indicate the percentages  
789 of the animals with nuclear-enriched NRDE-3 in seam cells (%N). The number of  
790 scored animals is indicated in parentheses. Scale bars, 5  $\mu$ m. (C) Results from the deep  
791 sequencing of total small RNAs from the indicated animals.

792

793 **Fig. 7.** A working model of risiRNA biogenesis and function. The processes of  
794 ribosome biogenesis are very sophisticated in eukaryotic cells from the splicing events  
795 of pre-rRNAs to the final assemblage of ribosomes, during which errors could occur at  
796 any step. In the nucleoli and nucleus, an exoribonucleolytic multisubunit protein  
797 complex, the exosome, participates in rRNA processing and degradation. In the  
798 cytoplasm, erroneous rRNAs are uridylated at the 3'-ends by polyuridylyating  
799 polymerase-I (named CDE-1 or PUP-1) and then degraded by the 3' to 5'  
800 exoribonuclease SUSI-1(ceDIS3L2). Deficiency of these two degradation systems  
801 results in the accumulation of erroneous uridylated rRNAs, which further recruit  
802 additional RNA-dependent RNA polymerases (RdRPs) to synthesize risiRNAs and  
803 initiate the nucleolar gene silencing cascade. risiRNAs associate with the nuclear  
804 argonaute protein NRDE-3 in soma or HRDE-1 in the germline, bind to pre-rRNAs,  
805 and inhibit RNAP I transcription elongation. Therefore, by combining the RNA  
806 degradation system with nucleolar gene silencing machinery, cells surveil the quality  
807 of rRNAs and maintain the homeostasis.

808

809

810

811



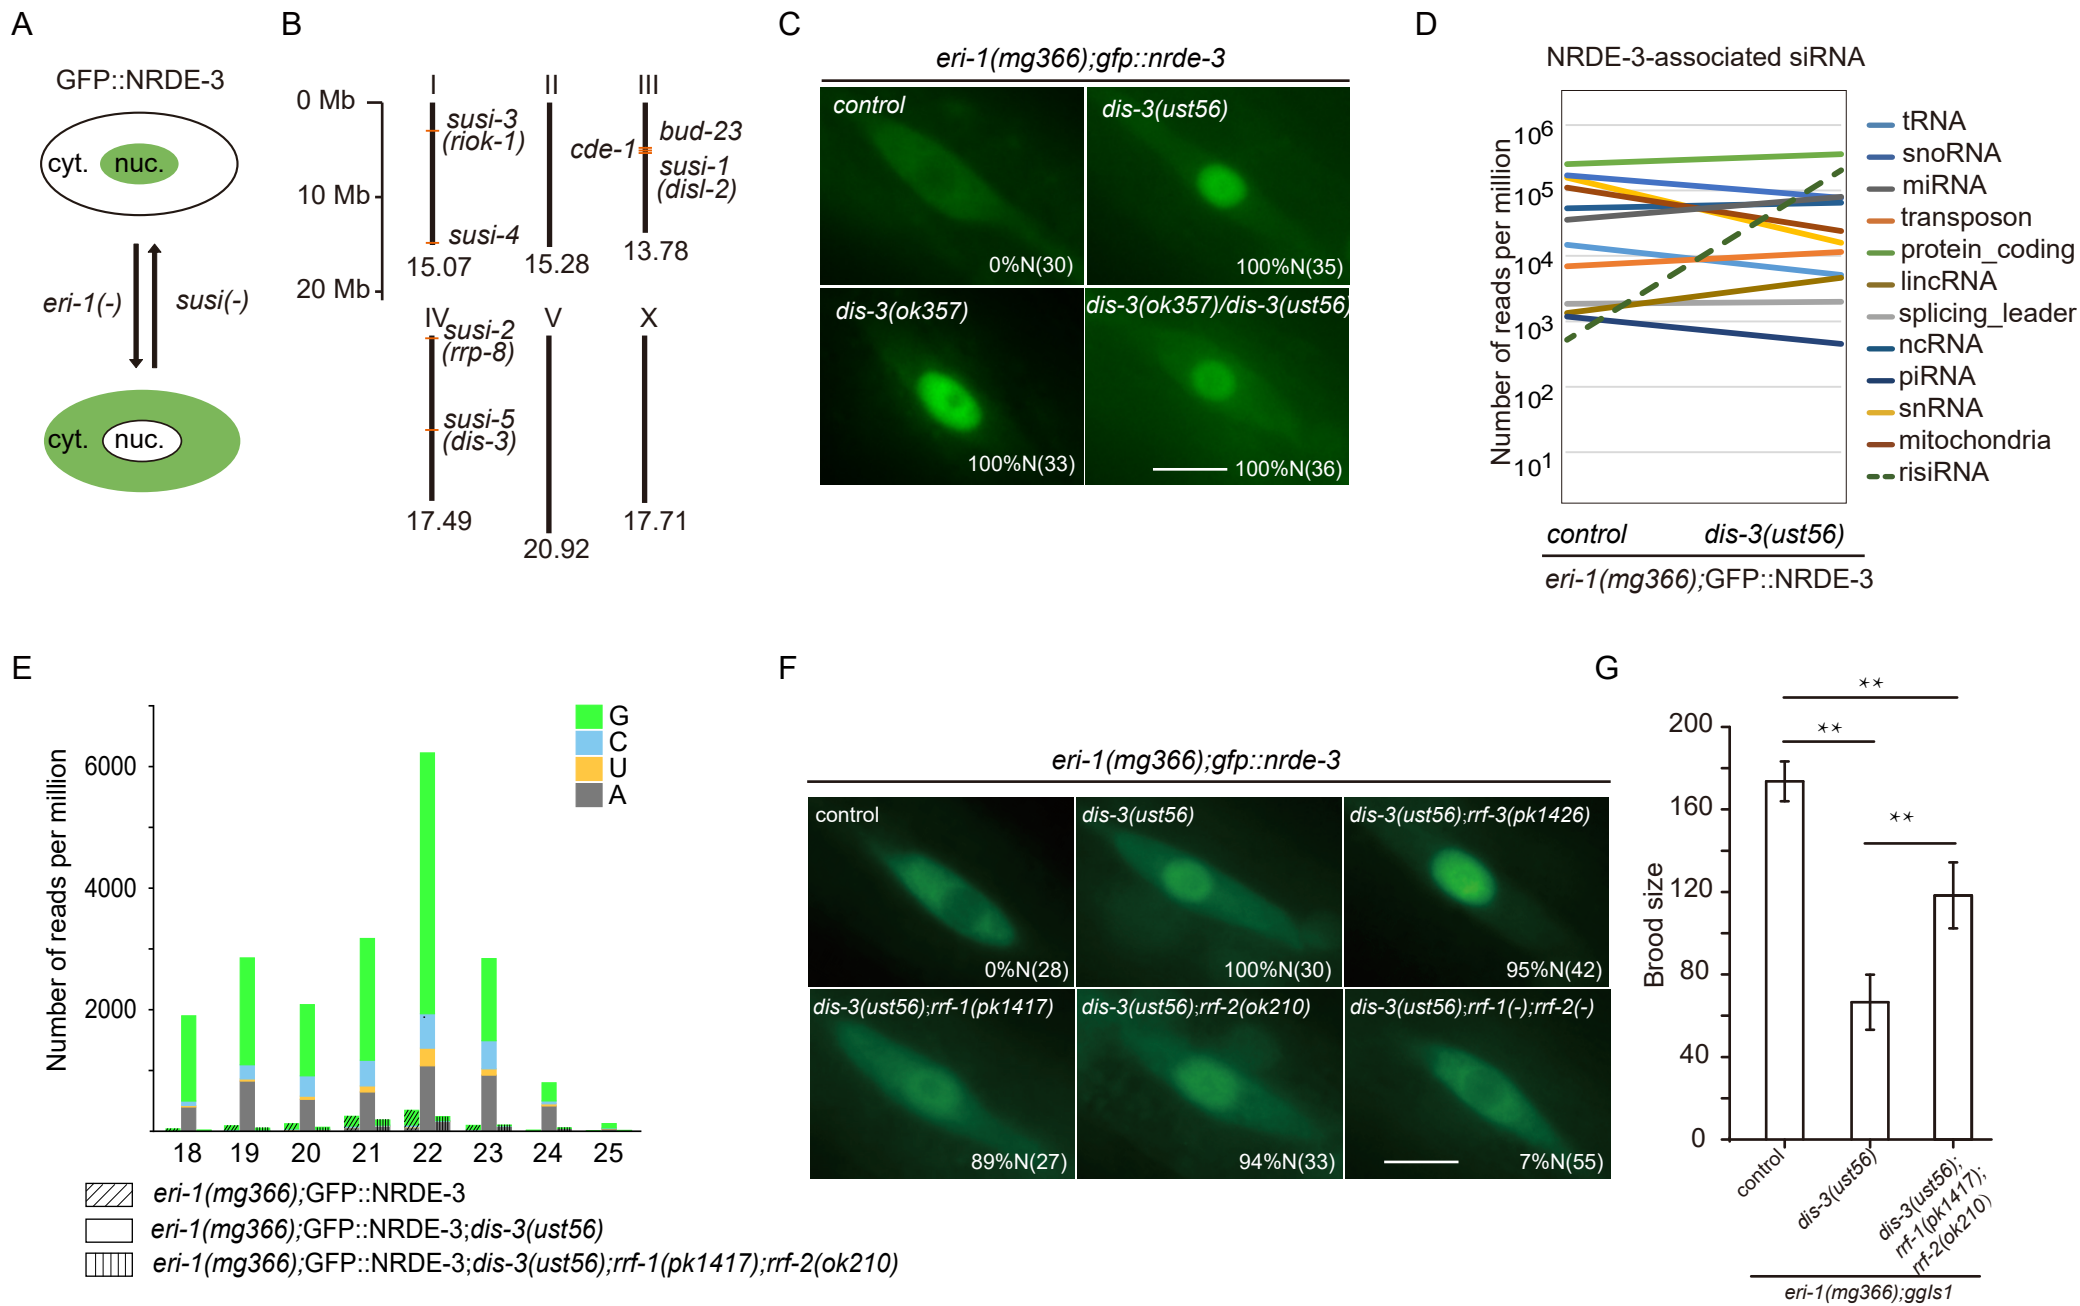

Figure 1

A

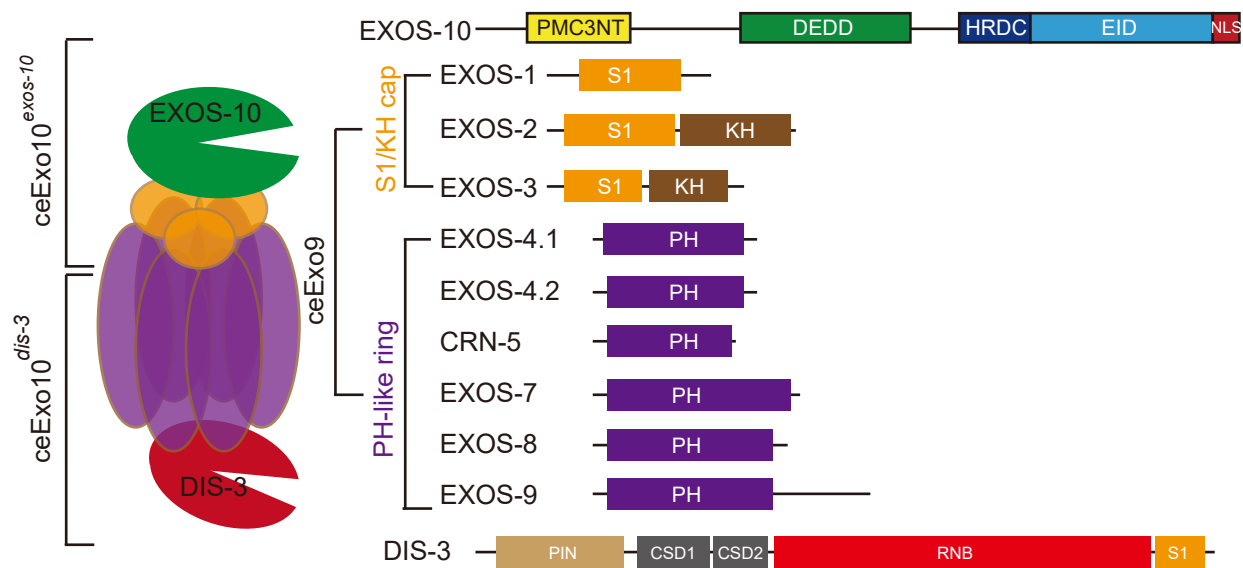

B

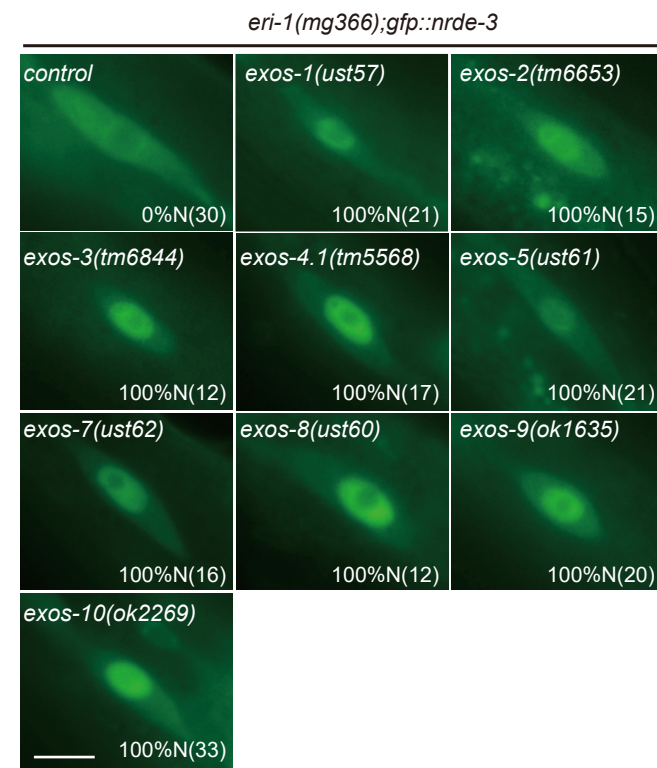

C

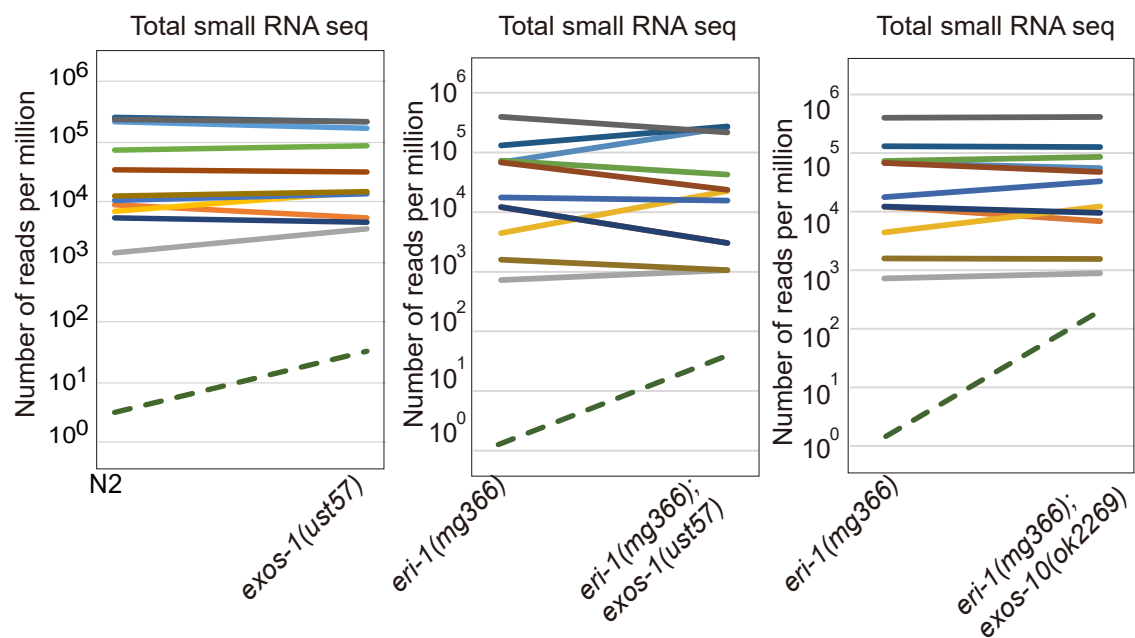

D

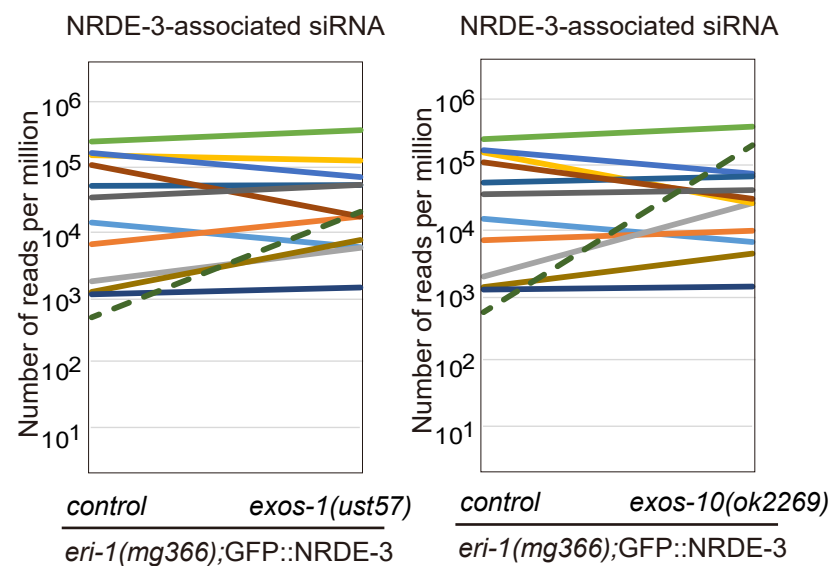

Figure 2



A

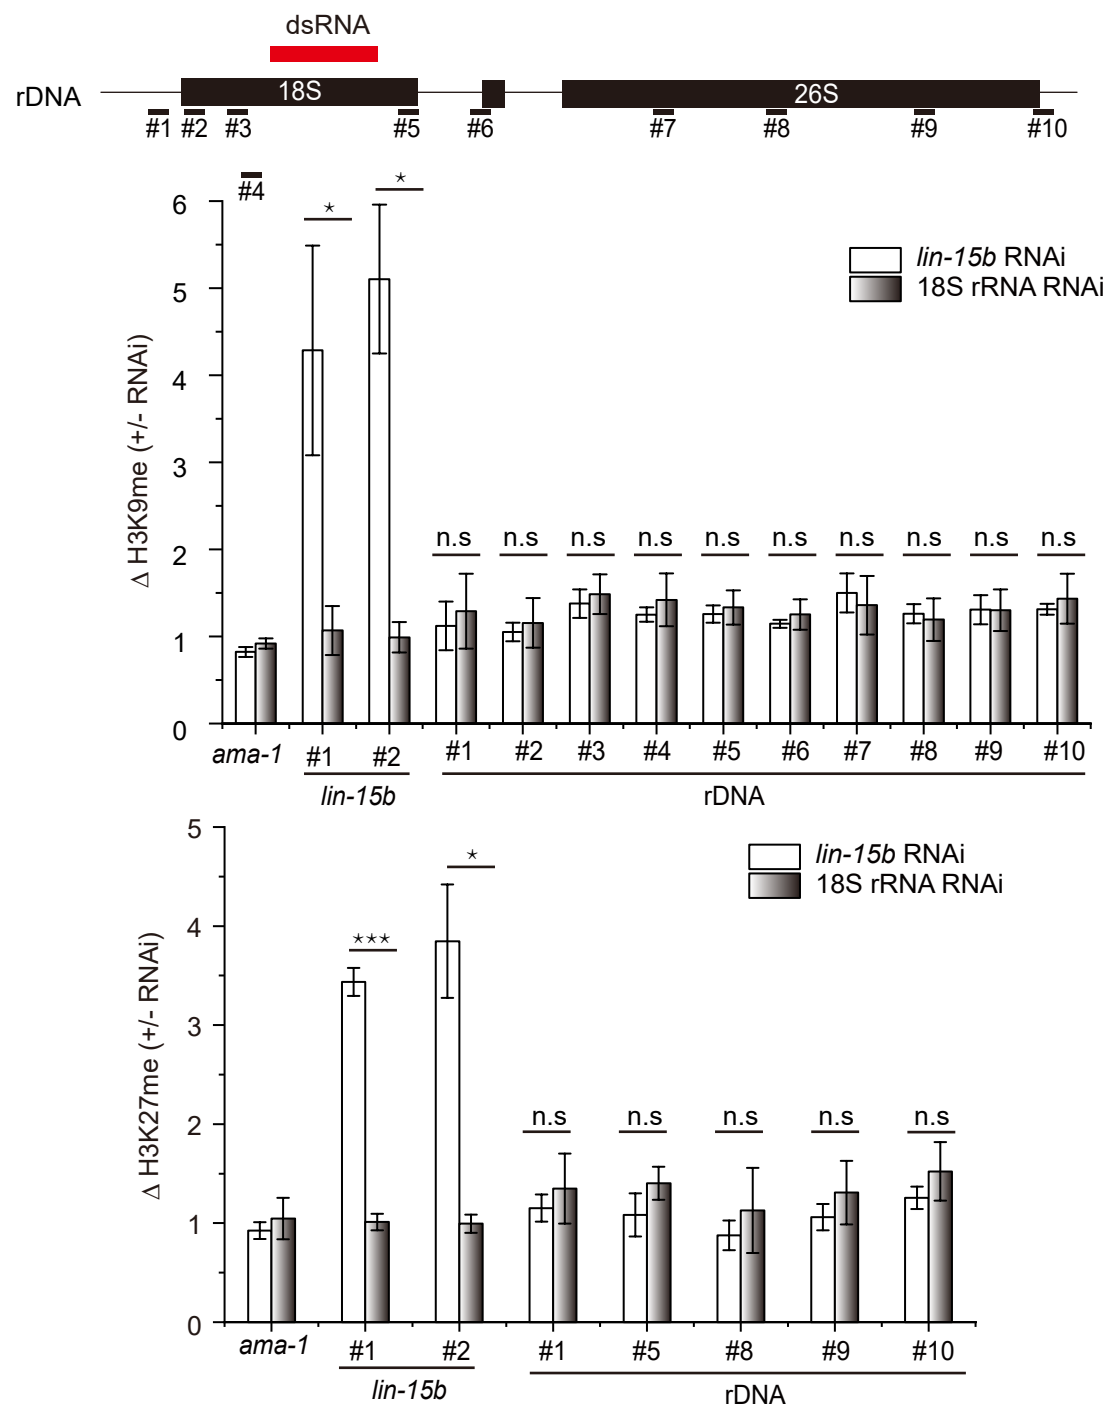

B

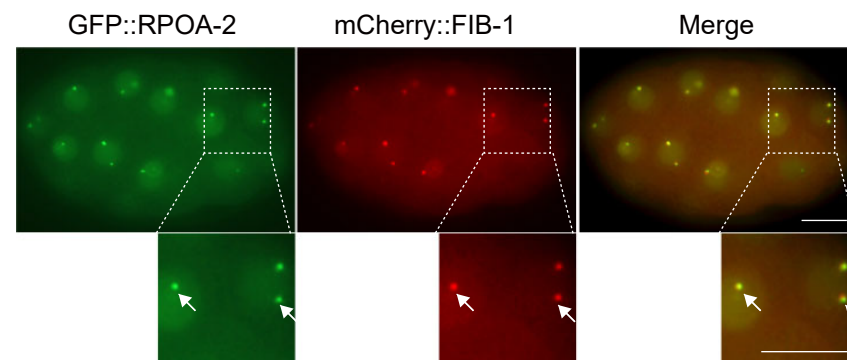

C

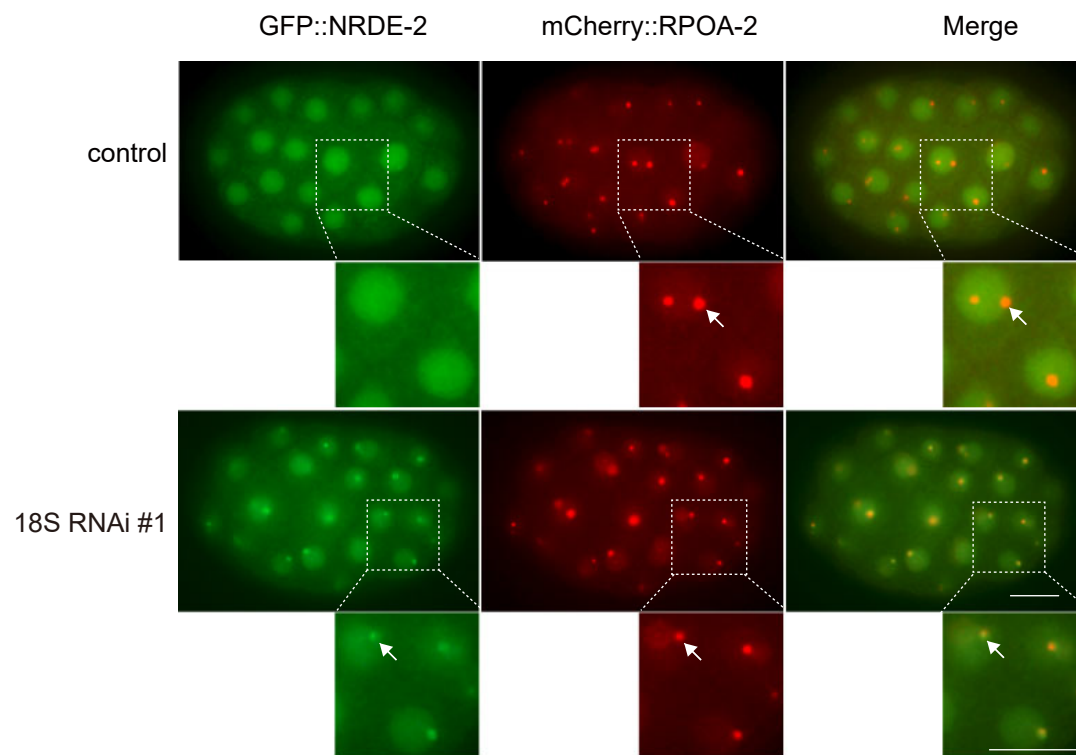

Figure 3

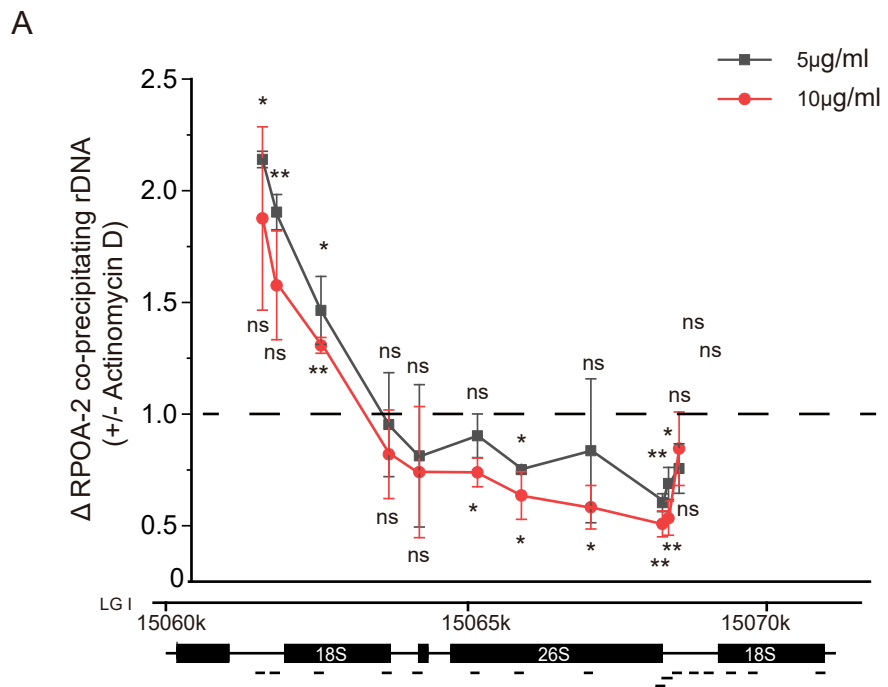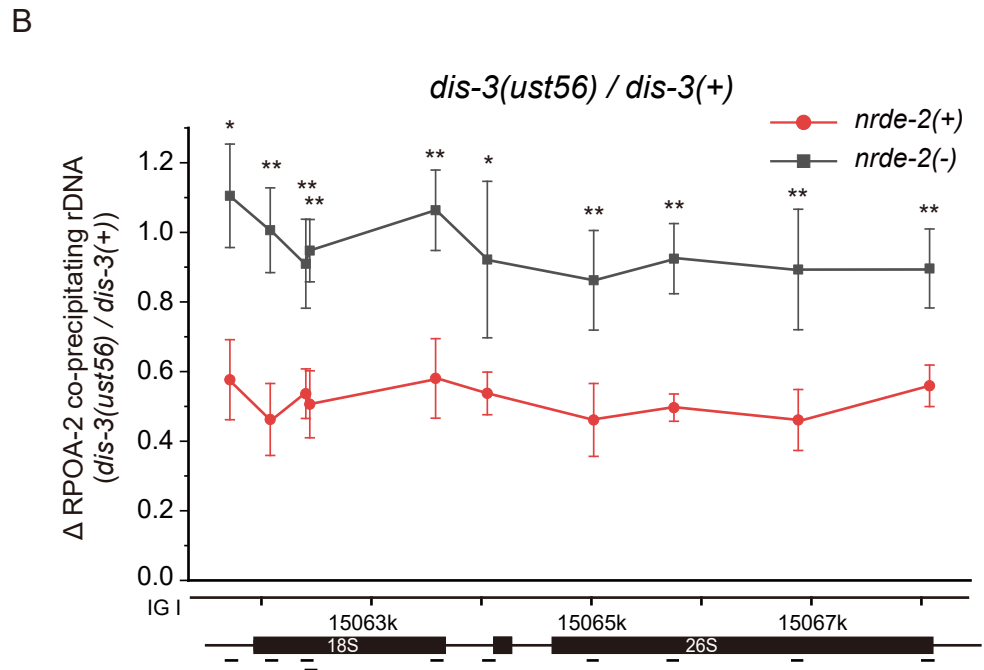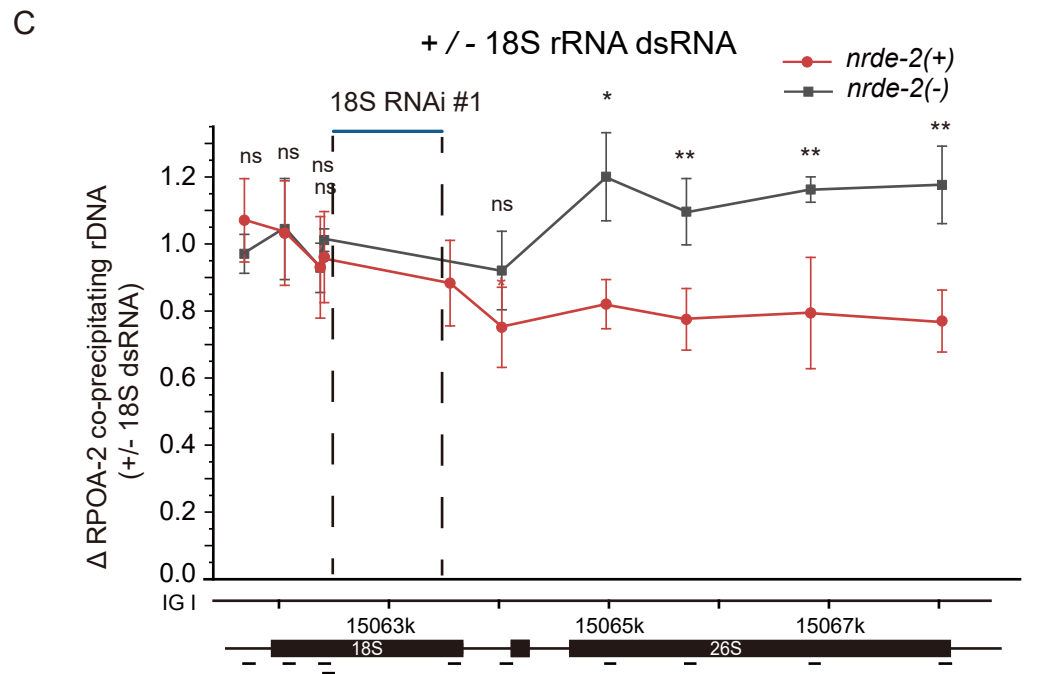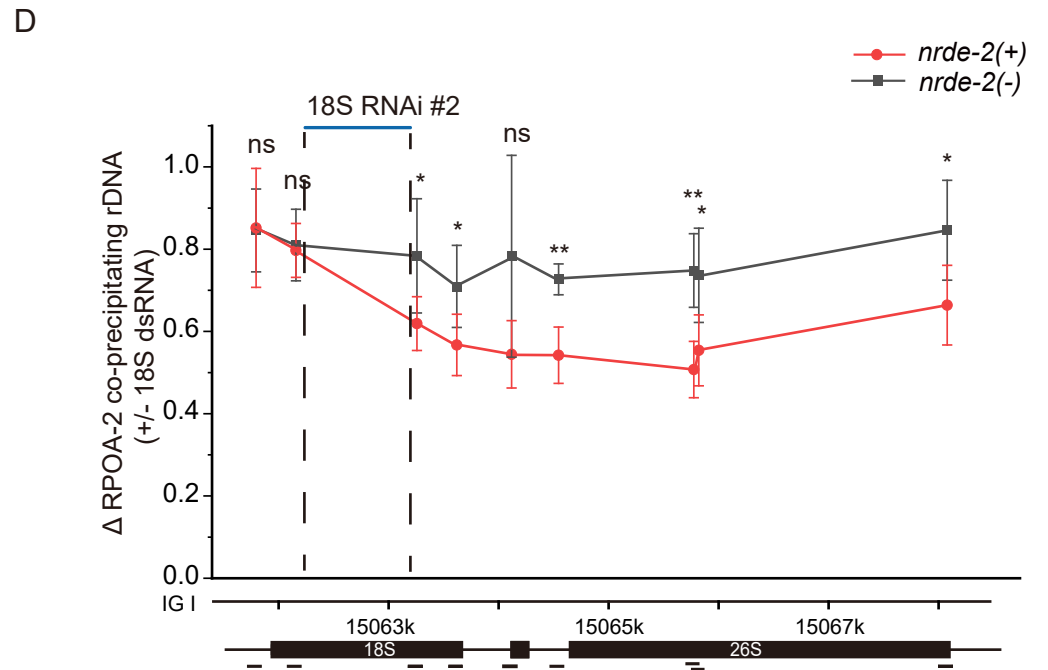

Figure 4

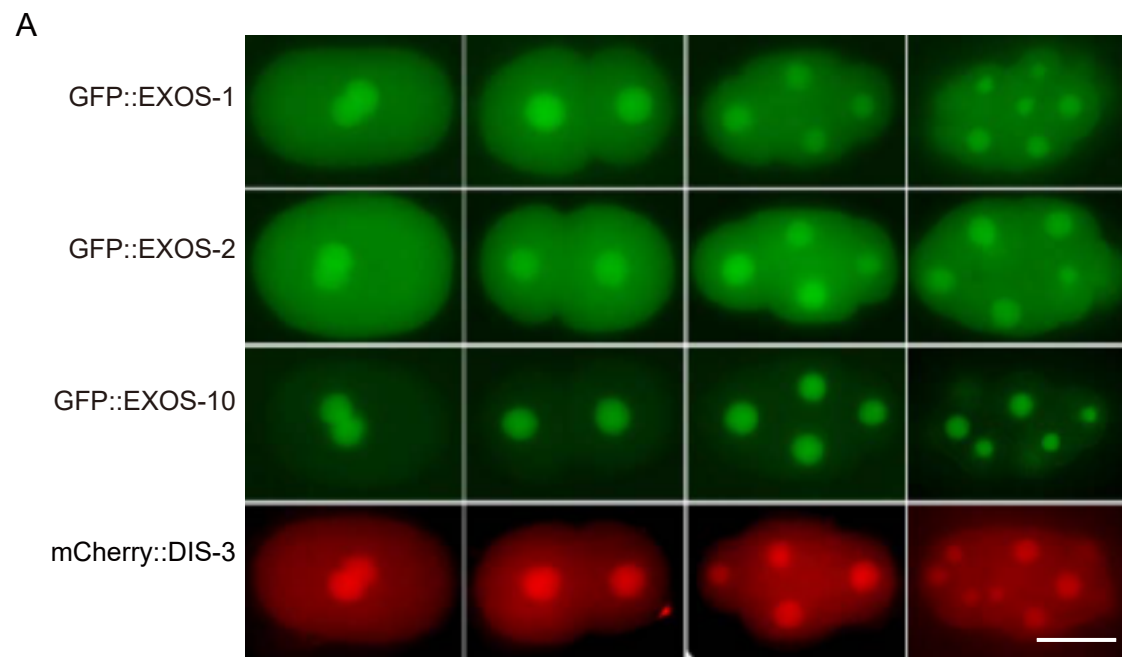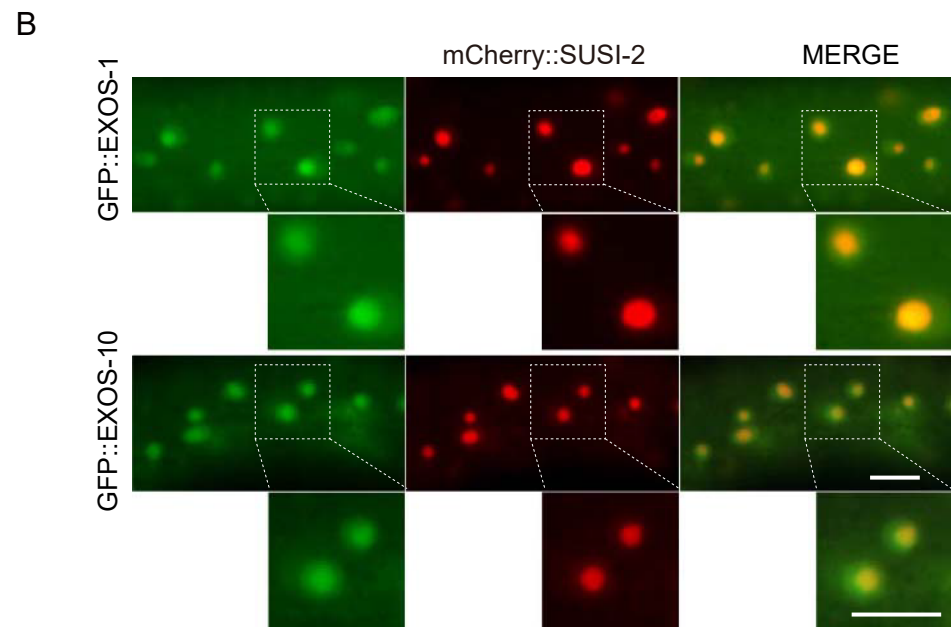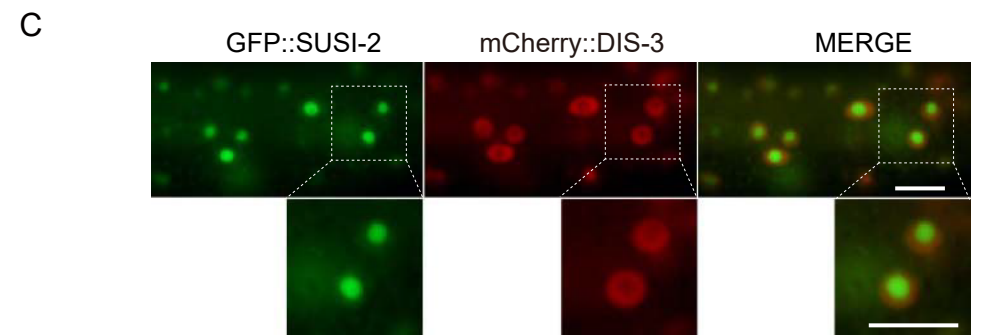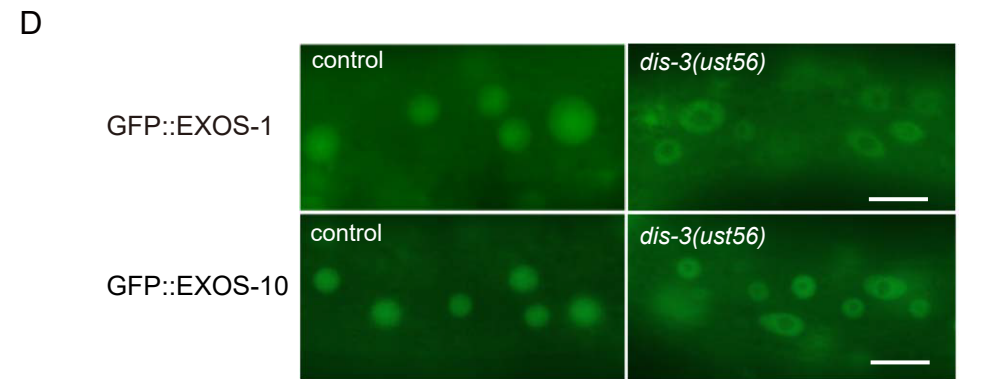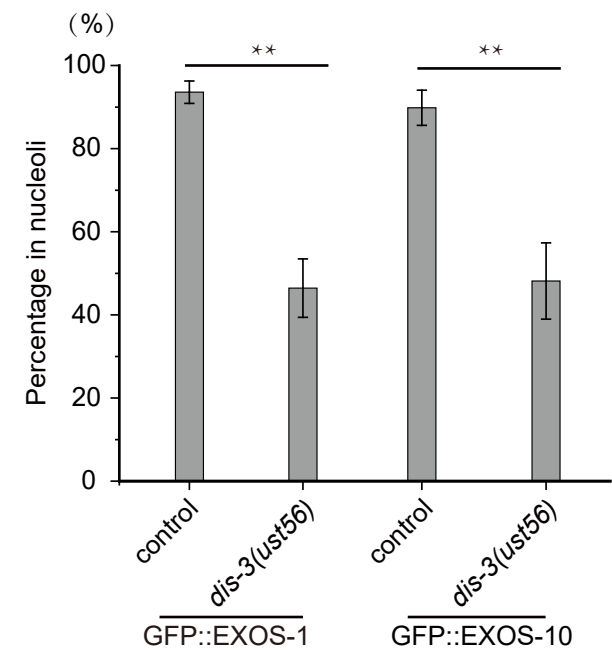

Figure 5

A

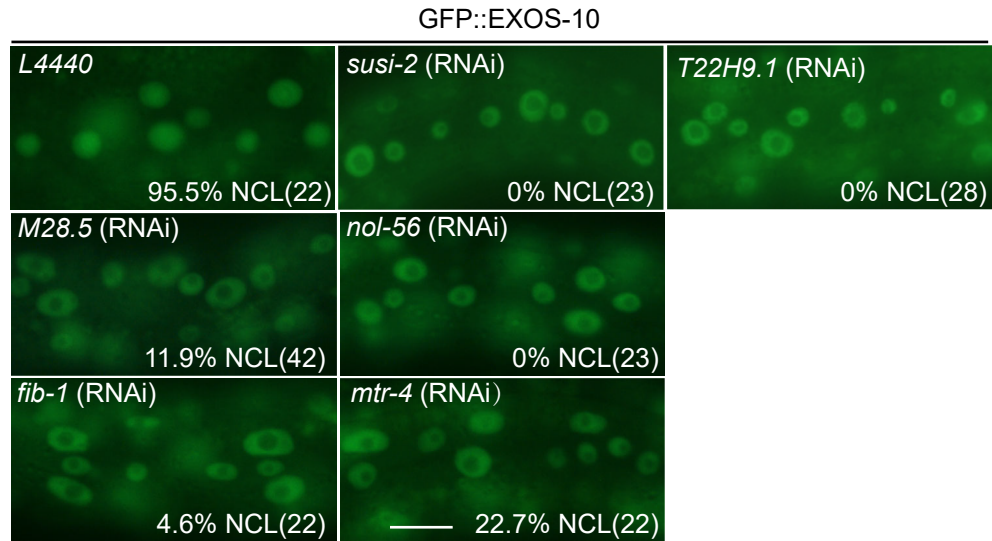

B

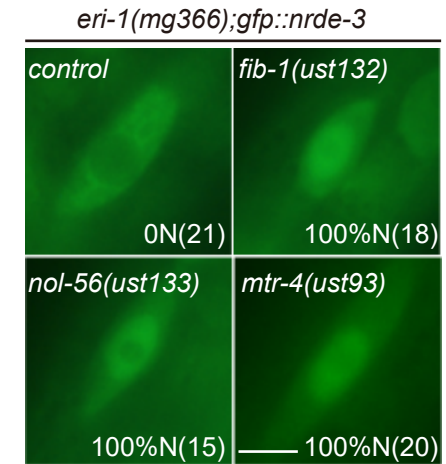

C

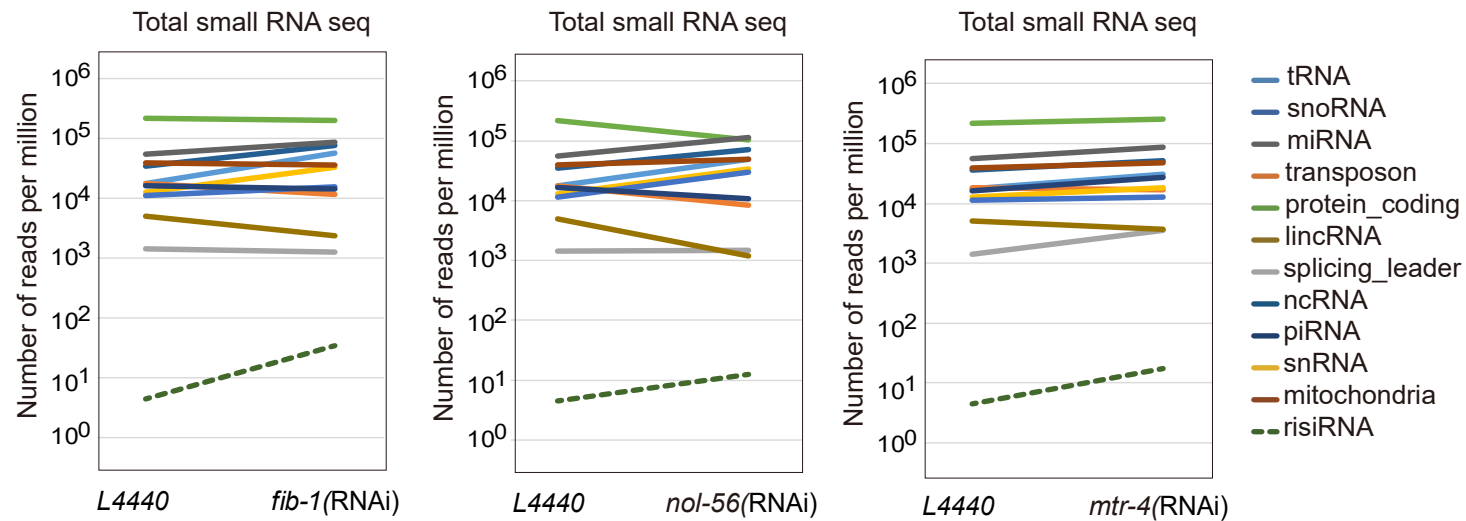

Figure 6

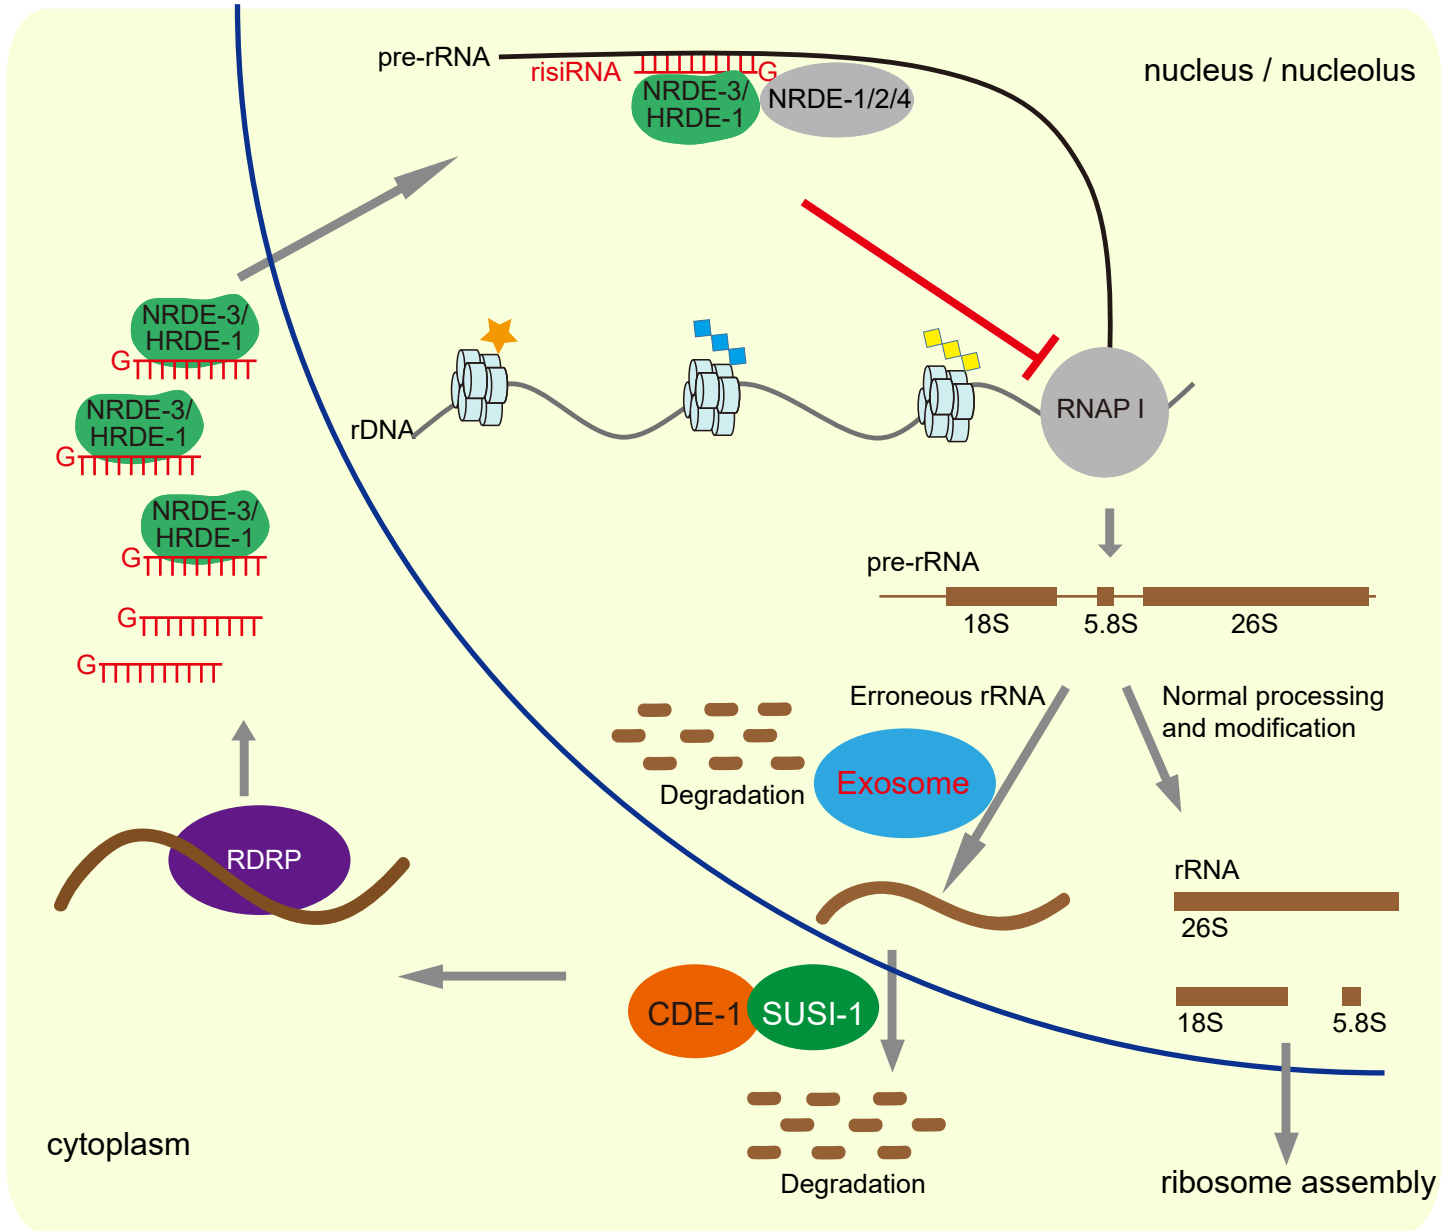

Figure 7
